1 **Trypanosomes have divergent kinesin-2 proteins that function differentially in IFT,**  
2 **cell division, and motility**

3  
4 Robert L. Douglas, Brett M. Haltiwanger‡, Haiming Wu, Robert L. Jeng§, Joel Mancuso||, W.  
5 Zacheus Cande, and Matthew D. Welch\*

6  
7  
8 Department of Molecular & Cell Biology, University of California, Berkeley, CA 94720;

9 ‡Present address: University of Texas, Health Science Center, Houston, TX 77030; § Present

10 address: Aires Pharmaceuticals, San Diego, CA 92122; || Present address: Carl Zeiss

11 Microscopy, Thornwood, NY 10594; \*Correspondence

12

13

14

15

16

17

18

19

20

21

22

23 **Running Head:** Kinesin-2 function in trypanosomes

## 24 **Summary**

25           *Trypanosoma brucei*, the causative agent of African sleeping sickness, has a flagellum  
26 that is crucial for motility, pathogenicity, and viability. In most eukaryotes, the intraflagellar  
27 transport (IFT) machinery drives flagellum biogenesis, and anterograde IFT requires kinesin-2  
28 motor proteins. In this study, we investigated the function of the two *T. brucei* kinesin-2 proteins,  
29 TbKin2a and TbKin2b, in bloodstream form trypanosomes. We found that compared to other  
30 kinesin-2 proteins, TbKin2a and TbKin2b show greater variation in neck, stalk, and tail domain  
31 sequences. Both kinesins contributed additively to flagellar lengthening. Surprisingly, silencing  
32 TbKin2a inhibited cell proliferation, cytokinesis and motility, whereas silencing TbKin2b did  
33 not. TbKin2a was localized on the flagellum and colocalized with IFT components near the basal  
34 body, consistent with it performing a role in IFT. TbKin2a was also detected on the flagellar  
35 attachment zone, a specialized structure in trypanosome cells that connects the flagellum to the  
36 cell body. Our results indicate that kinesin-2 proteins in trypanosomes play conserved roles in  
37 IFT and exhibit a specialized localization, emphasizing the evolutionary flexibility of motor  
38 protein function in an organism with a large complement of kinesins.

## 39 **Introduction**

40 *Trypanosoma brucei* spp. are kinetoplastid parasites that cause African trypanosomiasis  
41 (African sleeping sickness) in humans and animals (Brun et al., 2010; Kennedy, 2013). They are  
42 transmitted to mammals by the tsetse fly and progress through multiple life-cycle stages  
43 including insect vector procyclic form (PCF) and infective mammalian bloodstream forms  
44 (BSF). In human African trypanosomiasis (HAT), the bloodstream form proliferates  
45 extracellularly in the blood and then in the central nervous system (Kennedy, 2013). HAT is a  
46 significant cause of morbidity and mortality in sub-Saharan Africa. However, current treatment  
47 options have significant issues with toxicity, cost, difficulty of administration, non-specificity,  
48 and drug resistance (Robays et al., 2008; Wilkinson et al., 2008). Thus, the development of new  
49 drugs is imperative.

50 *T. brucei* is highly motile and its motility is driven by a single membrane-bound cilium  
51 (flagellum) containing a canonical 9+2 microtubule axoneme with a filamentous paraflagellar  
52 rod (PFR) (Langousis and Hill, 2014; Ralston et al., 2009). The flagellum attaches to the cell  
53 body along the flagellar attachment zone (FAZ) (Sunter and Gull, 2016; Taylor and Godfrey,  
54 1969), a specialized structure running beneath the plasma membrane along the length of the  
55 flagellum. The FAZ contains four specialized subpellicular microtubules (the microtubule  
56 quartet, MtQ), associated intracellular membranes contiguous with the endoplasmic reticulum  
57 (ER) and nuclear envelope (NE), and a filament system that connects to the axoneme and PFR  
58 via several membrane-spanning structures (Kohl and Bastin, 2005; Ralston et al., 2009; Sunter  
59 and Gull, 2016; Taylor and Godfrey, 1969). The flagellum beats in distinctive wave patterns that  
60 are adapted for movement in the bloodstream (Heddergott et al., 2012; Rodríguez et al., 2009).  
61 Movement of BSF *T. brucei* is essential for cell viability and cytokinesis (Broadhead et al., 2006;

62 Ralston and Hill, 2006), development and pathogenesis (Langousis and Hill, 2014), evasion of  
63 complement-mediated cell killing (Engstler et al., 2007), and crossing the blood-brain barrier  
64 (Kennedy, 2013; Ralston et al., 2009).

65 The biogenesis of flagella requires the intraflagellar transport (IFT) machinery, which  
66 consists of an evolutionarily conserved suite of IFT proteins (Taschner and Lorentzen, 2016; van  
67 Dam et al., 2013) and kinesin and dynein motors (Prevo et al., 2017; Scholey, 2013). This  
68 machinery is under dynamic regulation to control flagellar structure and function (Heddergott et  
69 al., 2012; Ishikawa and Marshall, 2011). The IFT machinery moves cargos along the axoneme in  
70 IFT trains (Cole et al., 1993; Cole et al., 1998; Kozminski et al., 1993; Lechtreck, 2015; Pigino et  
71 al., 2009) and mediates cargo entry into and exit from the flagellar compartment (Buisson et al.,  
72 2013; Dishinger et al., 2010; Verhey et al., 2011). Anterograde IFT transport is driven primarily  
73 by kinesin-2 family motor proteins (Scholey, 2013), including two major subfamilies:  
74 heterotrimeric kinesin-2, comprising two different kinesin motor subunits (2A and 2B; KRP85  
75 and KRP95) (Cole et al., 1993; Kozminski et al., 1995) and the non-motor kinesin-associated  
76 protein (KAP) (Mueller et al., 2005; Wedaman et al., 1996); and homodimeric kinesin-2, which  
77 consists of two identical (2C; OSM3) motor subunits (Scholey, 2013; Signor et al., 1999). In  
78 metazoans these two subfamilies have been shown to act both cooperatively and independently  
79 in IFT (Insinna and Besharse, 2008; Prevo et al., 2015; Snow et al., 2004). Kinesin-2 proteins  
80 also participate in extraciliary processes including: cargo transport of organelles, proteins, RNAs,  
81 and viruses; mitosis; cytokinesis; cell polarization; and cell adhesion and development (Scholey,  
82 2013).

83 In this study, we investigate the function of kinesin-2 proteins in BSF *T. brucei*. The *T.*  
84 *brucei* genome encodes approximately 48 kinesins including two kinesin-2 proteins (Berriman et

85 al., 2005; Wickstead et al., 2010b), TbKin2a and TbKin2b. Our bioinformatic analysis suggests  
86 that TbKin2a and TbKin2b lack common sequence motifs that are otherwise broadly conserved  
87 in kinesin-2 proteins and lack the KAP subunit, which is required for heterotrimer function. We  
88 further found that both TbKin2a and TbKin2b contribute to flagellar biosynthesis in BSF *T.*  
89 *brucei*. Interestingly, silencing TbKin2a inhibits cell proliferation, cytokinesis, and motility,  
90 whereas silencing TbKin2b does not. Moreover, TbKin2a localizes to the FAZ, suggesting it  
91 functions both within the flagellum and cell body. Thus, kinesin-2 proteins in trypanosomes play  
92 roles in IFT and may also engage in unanticipated roles.

93

## 94 **Results**

### 95 **T. brucei has two divergent kinesin-2 proteins.**

96 The *T. brucei* genome encodes the kinesin-2 proteins TbKin2a (Tb927.5.2090) and  
97 TbKin2b (Tb927.11.13920) (Fig. 1A), which were primarily classified according to their motor  
98 domain sequences (Berriman et al., 2005; Wickstead and Gull, 2006; Wickstead et al., 2010b)  
99 using phylogenetic inference analysis (Goodson et al., 1994; Wickstead et al., 2010b) (see Fig.  
100 S1A for kinesin-2 phylogenetic tree topology from (Wickstead et al., 2010b); see Table S1 for  
101 sequence identity comparison of motor domains (MD)). However, sequences in the neck-stalk-  
102 tail (NST) region, while not as well conserved as motor domain sequences (average of 17% NST  
103 sequence identity versus 54% MD sequence identity), are also important for kinesin function in a  
104 variety of metazoan species (De Marco et al., 2001; De Marco et al., 2003; Doodhi et al., 2009;  
105 Imanishi et al., 2006; Vukajlovic et al., 2011) (see Table S2 for identity comparison of NST  
106 sequences). Nevertheless, systematic analysis of kinesin-2 (or other kinesin) NST sequence  
107 motifs in a broad evolutionary context has been limited. We thus sought to further categorize  
108 kinesin-2 proteins based on NST sequences.

109 We compiled a phylogenetically diverse set of 81 kinesin-2 sequences from 25 species  
110 (Table S3A), which represent a broad cross-section of known phylogenetic diversity, and used  
111 the multiple Em for motif elicitation (MEME) tool suite to analyze these sequences (Fig. 1B-E;  
112 Fig. S1, Fig. S2, Table S3A and S3B). MEME correctly identified the known kinesin-2 neck  
113 region sequences that start the NST domain for all kinesin-2 proteins (Case et al., 2000; Vale and  
114 Fletterick, 1997). Not unexpectedly MEME identified a single 31 amino acid motif consistent  
115 with a kinesin-2 neck domain at the beginning of the NST domain for all kinesin-2 proteins in  
116 our data set (Case et al., 2000; Vale and Fletterick, 1997). MEME also identified over 20  
117 additional, statistically significant NST sequence motifs that can be sorted into distinct ordered  
118 motif groups that are broadly conserved across all kinesin-2 containing eukaryotic superfamilies  
119 from Metazoa to Excavata (Fig. 1D, E). Notably, motifs forming a primary (1°) motif group were  
120 found to be common to almost all protist and metazoan taxa. A secondary (2°) motif group that  
121 is frequently associated with coiled-coil domains, as well as motifs that are specific to subgroups  
122 2A and/or 2B, were also widely shared among protists and metazoa (Fig. 1B-E; Fig. S1B, C; Fig.  
123 S2). The assignment of protist kinesin-2 taxa into subgroups 2A and 2B was not observed in the  
124 phylogenetic analyses based on motor domain sequences. MEME also assigned 2C motifs to  
125 metazoan kinesin-2C taxa, but such motifs were absent from protist taxa. The primary exception  
126 was a single 2C motif shared in kinetoplastids and metazoans, as discussed below (Fig. 1B-E;  
127 Fig. S1, Fig. S2).

128 The greatest divergence in NST sequence motifs occurs within the kinetoplastids  
129 including *T. brucei* (Fig. 1B-E). Kinetoplastid kinesin-2 NST domains are longer, have more  
130 extensive predicted coiled-coil sequences, and lack most motif groups that are present in other  
131 protists and metazoans (Fig. 1; Fig. S2). Instead, the kinetoplastids have unique motif groups

132 (knto/k) that are specific to these organisms. Parasititic kinetoplastid species (Julkowska and  
133 Bastin, 2009) and the free living *B. saltans*, lack the KAP subunit (k3) (Fig. 1B, D), which is  
134 required for kinesin-2 heterotrimer function and is present in all other organisms included in our  
135 analysis. Surprisingly, MEME assigned to the kinetoplastid homologs of TbKin2b a single,  
136 statistically significant kinesin-2C (OSM3) motif that is also present only in metazoan taxa (Fig.  
137 1B-E; Fig. S1, Fig. S2). Together, these results suggest that kinetoplastid kinesin-2 proteins form  
138 a unique subfamily and are unlikely to have a heterotrimeric structure consisting of 2A, 2B and  
139 KAP subunits. Thus, MEME analysis of NST sequences suggests that kinesin-2 proteins in *T.*  
140 *brucei* have diverged from such proteins in other organisms, raising questions about the extent to  
141 which canonical functions of these proteins are conserved in trypanosomes, and if novel  
142 functions have evolved.

143

144 **TbKin2a distributes along the length of the flagellum, with stronger localization near the**  
145 **basal body.**

146 To assess the function of kinesin-2 proteins in *T. brucei*, we first raised antibodies that  
147 specifically recognize the ~130 kD TbKin2a protein on immunoblots of whole-cell lysates  
148 (supplementary material Fig. S3) and assessed TbKin2a localization in BSF cells by  
149 immunofluorescence microscopy. TbKin2a localized in a punctate pattern along the flagellum  
150 (Fig. 2A). During the cell cycle, TbKin2a staining intensity on flagella increased and relative  
151 staining between old and new flagella remained roughly equivalent, except that TbKin2a  
152 typically showed enhanced staining on new flagella relative to old flagella primarily during the  
153 1N1K stage. This reflects the cytoskeletal changes associated with the emergence of the new  
154 flagellum (Gluezn et al., 2011; Ikeda and de Graffenried, 2012; Lacomble et al., 2010). We also

155 determined the mean fluorescence intensity along full-length flagella. Using the peak intensity of  
156 DAPI-stained kinetoplast DNA as a posterior reference point (Fig. 2B), we determined that the  
157 flagellar intensity profile (on both old and new flagella) had two peaks at  $\sim 0.7 \mu\text{m}$  and  $\sim 2.1 \mu\text{m}$ ,  
158 approximating locations near the basal body and flagellar collar. Past the second peak, staining  
159 diminished to the anterior tip, where it increased slightly, with 65% of integrated staining  
160 intensity being confined to the proximal half of the flagellum.

161 TbKin2a also localized in the region of the kinetoplasts and basal bodies throughout their  
162 duplication cycle (Fig. 2C-E). There was extensive overlap between TbKin2a and basal bodies,  
163 as marked by the proximal-end basal body marker, BBA4 (Dilbeck et al., 1999; Woods et al.,  
164 1989) (Fig. 2E; threshold-adjusted Mander's colocalization coefficient for BBA4/TbKin2a of  
165 0.738 (Manders et al., 1993)). Moreover, TbKin2a and BBA4 colocalized with kinetoplastid  
166 DNA near the proximal ends of basal bodies (Fig. 2E). Thus, TbKin2a is positioned on the basal  
167 body adjacent to the kinetoplast. Given its localization pattern, TbKin2a may be a useful marker  
168 to visualize progressive changes in the positioning and orientation of kinetoplasts, basal bodies,  
169 and flagella during cell-cycle progression and new flagellum biogenesis.

170

### 171 **TbKin2a colocalizes with IFT proteins primarily at the flagellum base.**

172 Although the canonical role of kinesin-2 proteins is in IFT (Lechtreck, 2015; Scholey,  
173 2013), the divergent sequence of TbKin2a raised the question of whether it retains its function in  
174 IFT in trypanosomes. In *T. brucei*, full complements of IFT complex B (anterograde; IFTB) and  
175 IFT complex A (retrograde; IFTA) proteins have been identified and localized to the flagellum  
176 and basal body regions (Absalon et al., 2008; Adhiambo et al., 2009; Franklin and Ullu, 2010),  
177 and shown to function in IFT including the movement of cargo trains (Blisnick et al., 2014;



178 Buisson et al., 2013; Huet et al., 2014). We co-stained for TbKin2a with IFTB marker IFT172  
179 (Fig. 3A-D) or IFTA marker IFT144 (Fig. 3E). As previously reported in PCF cells (Absalon et  
180 al., 2008), in BSF cells these markers exhibited punctate staining along the flagellum and  
181 increased intensity near basal bodies. Along the flagellum, there was little colocalization between  
182 TbKin2a and either IFT172 or IFT144 (Fig. 3A, C, E, F; mean Mander's colocalization  
183 coefficients 0.164 and 0.278, respectively). However, in the region near the kinetoplasts, basal  
184 bodies, and proximal ends of flagella, colocalization between TbKin2a and each IFT protein was  
185 observed (Fig. 3B, D, E, F; mean Mander's colocalization coefficients of 0.655 and 0.636, for  
186 IFT172 and IFT144, respectively). This suggests that despite its sequence divergence, TbKin2a  
187 interacts with IFT complex proteins, primarily near the flagellum base.

188

#### 189 **TbKin2a localizes to the FAZ throughout the cell cycle.**

190         Given the tight association of the flagellum with the FAZ, we sought to distinguish  
191 whether TbKin2a also localizes to the FAZ. The flagellum can be detached from FAZ and cell  
192 body by detergent extraction, which permits separate visualization of the components localized  
193 to each structure (Robinson et al., 1991). Surprisingly, at all stages of the cell cycle, TbKin2a  
194 colocalized with the FAZ marker L3B2 (Kohl et al., 1999) in a continuous punctate pattern from  
195 the initiation of the FAZ (start of L3B2 staining) near the flagellar collar (Lacomble et al., 2010;  
196 Lacomble et al., 2009) to the anterior tip (Fig. 4A) (in contrast, we did not observe evidence of  
197 IFT172 colocalization with FAZ, not shown). Because detergent extraction significantly  
198 diminished TbKin2a staining on flagella (also observed with IFT proteins) (Absalon et al., 2008),  
199 we sought to identify conditions to separate the flagellum and FAZ without detergent extraction  
200 following fixation. We found that the flagellum and FAZ were sometimes partially separated due

201 to shear forces during mounting. Under these circumstances, TbKin2a could always be seen on  
202 both structures (Fig. 4B, C). We found that we could also use deliberate but controlled shearing  
203 to induce similar separation of the flagellum and FAZ post-fixation and that under these  
204 circumstances, TbKin2a could also always be seen on both structures (Fig. 4D, E). Collectively,  
205 these results indicate that TbKin2a associates with the FAZ as well as with the flagellum.

206

207 **Silencing of TbKin2a inhibits growth of BSF *T. brucei*, whereas silencing of TbKin2b does**  
208 **not.**

209 To determine the importance of kinesin-2 proteins in BSF *T. brucei*, we used RNA  
210 interference (RNAi) to silence expression of TbKin2a, TbKin2b, or both. TbKin2a mRNA was  
211 diminished at 24 h and 48 hpi post induction (hpi) of dsRNA expression in TbKin2a-silenced  
212 cells, but remained unaffected in TbKin2b-silenced cells, as assessed by RT-PCR (Fig. 5A) and  
213 qRT-PCR (Fig. 5B). Similarly, TbKin2b mRNA was diminished at 24 hpi and 48 hpi in  
214 TbKin2b-silenced cells but was unaffected in TbKin2a-silenced cells (Fig. 5A, B). Both mRNAs  
215 were diminished in TbKin2a/2b-silenced cells. For TbKin2a, protein expression was strongly  
216 diminished after 48 hpi (Fig. 5A).

217 Interestingly, TbKin2a-silenced cells proliferated at a rate 50-70% lower than in  
218 uninduced cells after 24 hpi and ceased proliferation by 48 hpi (Fig. 5C). For TbKin2b-silenced  
219 cells, proliferation did not decrease significantly for 72-96 hpi (Fig. 5C). Silencing both TbKin2a  
220 and TbKin2b together resulted in a cessation of proliferation with kinetics similar to single  
221 TbKin2a knockdown (Fig. 5C). Thus, cell proliferation in BSF *T. brucei* requires TbKin2a, but  
222 proliferation is not affected by RNAi silencing of TbKin2b.

223 Evidence of the essential role of TbKin2a in cell proliferation led us to assess its role in  
224 cell-cycle progression. We first counted the numbers and observed the morphology of nuclei and

225 kinetoplasts at various time points after RNAi induction (Fig. 5D). Beginning at 24 hpi, the  
226 proportion of normal 1N1K (1 nucleus, 1 kinetoplast), 1N2K, and 2N2K cells decreased  
227 progressively, while abnormal cells with multiple nuclei and kinetoplasts ( $yN_xK$ ) or with one  
228 abnormally large nucleus and multiple kinetoplasts ( $1\uparrow N_xK$ ), increased progressively (Fig. 5D).  
229 We next observed the effect of TbKin2a silencing on the cell-cycle state by FACS (Fig. 5E).  
230 From 24 hpi to 48 hpi, the percentage of cells with 2C DNA content decreased, whereas the  
231 percentage of cells with 4C DNA content increased. After 48 hpi, there was a significant increase  
232 in the proportion of cells with  $\geq 4C$  DNA content. This suggests that nuclear DNA synthesis  
233 continued without complete nuclear separation and/or cytokinesis.

234 At the morphological level, cells induced for 24 h or longer became much larger than  
235 uninduced cells, accumulating multiple nuclei, flagella (Fig. 5F, G), and FAZ (Fig. 5H).  
236 Typically, flagella and FAZ clustered at the anterior ends of undivided cells, and there was little  
237 evidence of cleavage furrow formation or progression (Fig 5G, H). These results suggest that  
238 TbKin2a is important for early cytokinesis, which initiates at the anterior end (Sherwin and Gull,  
239 1989).

240 In addition, at 24 hpi, 48 hpi, and 72 hpi, cells showed nuclei that were often poorly  
241 defined or separated, resulting in large undivided or partially divided nuclear masses with  
242 numerous nucleoli (Fig. 5G-J). Although kinetoplast DNA replication appeared to continue,  
243 approximately 10-15% of kinetoplasts appeared to be partially separated or not separated (Fig.  
244 5G-J). Basal body duplication and separation were also ongoing, but we observed multiple  
245 TbKin2a- and TbKin2a/2b-silenced cells with unseparated kinetoplast DNA or basal bodies  
246 having no associated kinetoplast DNA (Fig. 5I-J). The ratio of basal bodies/flagella remained  
247 approximately 1:1. These results suggest that TbKin2a contributes to separation of nuclei and/or

248 kinetoplasts and may play a role in the association of basal bodies with kinetoplasts.

249

250 **TbKin2a and TbKin2b act additively in forming full-length flagella, but only TbKin2a is**  
251 **required for motility.**

252         Considering the established role of kinesin-2 in flagellar assembly in other organisms, we  
253 evaluated the effect of silencing TbKin2a and/or TbKin2b on flagella length. Surprisingly, given  
254 their sequence divergence from other kinesin-2 proteins, silencing either TbKin2a or TbKin2b  
255 for 72 h caused a decrease in flagellum length of 16% and 21%, respectively (Fig. 6A). Silencing  
256 both together caused a 42% decrease in flagellar length, which is approximately the additive  
257 impact of the individual knockdown. We did not observe a sub-population of flagella that  
258 remained long, in contrast with recent observations for silencing IFT proteins in PCF *T. brucei*  
259 (Fort et al., 2016) (the cytokinesis defect caused by TbKin2a silencing precludes separate  
260 identification of old and new flagella). This indicates that TbKin2a and TbKin2b act additively  
261 to build and/or maintain the flagellum in BSF *T. brucei*.

262         We also evaluated the effect of silencing TbKin2a, TbKin2b or both on the localization  
263 of IFT172 and IFT144 to flagella and the region of the basal body (Fig. 6B, C). The staining of  
264 IFT172 and IFT144 in flagella was diminished upon silencing TbKin2a or TbKin2a2b.  
265 Moreover, the localization of IFT144 near the basal body was diminished upon silencing  
266 TbKin2a or TbKin2b, whereas IFT172 staining in this location was unaffected by silencing of  
267 either protein. Together with the colocalization of TbKin2a with IFT proteins, these data suggest  
268 that TbKin2a, and possibly TbKin2b, play a role in IFT.

269         To determine whether the defects in flagellar length and IFT protein localization caused  
270 by TbKin2a silencing were linked with gross ultrastructural defects in the flagellum, we  
271 examined TbKin2a RNAi cells at 48-72 hpi using transmission electron microscopy (TEM) (Fig.

272 6D). Although cell morphology was dramatically perturbed, we observed infrequent gross  
273 structural anomalies in flagella and no FAZ defects. In TbKin2a-silenced cells, 13% (n = 55  
274 images) had abnormal accumulations of material between the flagellar membrane and axoneme  
275 outer pairs 3-4 or 8-9 (the location of IFT cargo trains in *T. brucei* (Absalon et al., 2008)),  
276 whereas <2% (n = 93 images) of control cells had such accumulations. Moreover, the nuclei of  
277 TbKin2a-silenced cells frequently displayed irregular shapes, areas of NE disorganization, and  
278 electron dense plaques of various sizes on the inner periphery of the NE (Fig. 6E, F). The  
279 plaques were similar in number and location to chromatin plaques observed at the periphery of  
280 nuclei in *T. brucei rhodesiense* beginning in late mitosis and persisting into interphase (Farr and  
281 Gull, 2012; Vickerman and Preston, 1970). This ultrastructural evidence is consistent with the  
282 conclusion that TbKin2a plays a role in IFT and suggests that it may also play a role in late cell-  
283 cycle timing as well as NE and chromatin organization.

284 To measure the impact of TbKin2a and TbKin2b silencing on flagellar motility, we  
285 adapted a previously established sedimentation assay for PCF *T. brucei* in which the rate of  
286 sedimentation is inversely proportional to the motility capacity (Bastin et al., 1999; Ralston et al.,  
287 2006). Sedimentation behavior was assessed over 4-8 h, beginning at 18 hpi, 24 hpi and 36 hpi.  
288 At 18-22 hpi, sedimentation rates for induced and uninduced cells were statistically equivalent  
289 (not shown). However, after 24 hpi, cells silenced for TbKin2a or TbKin2a/2b sedimented  
290 significantly faster than uninduced controls at every time point considered (Fig. 6G). In contrast,  
291 silencing TbKin2b alone did not result in faster sedimentation relative to controls. We conclude  
292 that TbKin2a silencing, but not TbKin2b silencing, results in a significant, progressive decrease  
293 in motility.

294 Finally, we evaluated the kinetics of onset of the TbKin2a RNAi phenotype by

295 identifying abnormal cell morphologies as they formed over the first 26 hpi. We observed small  
296 numbers of abnormal cells beginning 16 hpi, and over the next 4-8 hpi abnormal cells  
297 accumulated such that by 26 hpi over 20% of the cell population had abnormal morphologies.  
298 The most frequent abnormal phenotype was bundled flagella at the anterior end (Fig. 6H(i) and  
299 (ii)), and we also observed cells that were attached at their far posterior ends (Fig. 6H(iii)). Thus,  
300 two of the earliest phenotypes associated with silencing TbKin2a are an apparent failure to  
301 initiate or failure to complete cytokinesis.

302

### 303 **Discussion**

304 Kinesin-2 proteins perform an important and conserved function in IFT and flagellar  
305 biogenesis of primary and motile cilia (Lehtreck, 2015; Scholey, 2013). Kinesin-2 proteins have  
306 also been implicated in bidirectional endoplasmic reticulum (ER) to Golgi transport (Brown et  
307 al., 2014; Stauber et al., 2006), endosomal trafficking (Granger et al., 2014), transport in neurons  
308 (Hirokawa et al., 2010), cilium-based signaling (Goetz and Anderson, 2010), chromosome  
309 segregation (Haraguchi et al., 2006; Miller et al., 2005), and cytokinesis completion (Brown et  
310 al., 1999; Fan and Beck, 2004). Here, we report that the two kinesin-2 proteins TbKin2a and  
311 TbKin2b in BSF *T. brucei* function in flagellar biogenesis, but only TbKin2a appears to be  
312 crucial for cell proliferation. In addition, TbKin2a is found on the FAZ, suggesting a possible  
313 role in FAZ-based transport. Thus, kinesin-2 proteins in trypanosomes are likely to perform both  
314 canonical and trypanosome-specific roles.

315

### 316 **Trypanosome kinesin-2 proteins have divergent NST sequences.**

317 The results of our MEME analysis complements previous kinesin bioinformatics studies

318 (Berriman et al., 2005; Wickstead et al., 2010b) by identifying conserved sequence motifs in the  
319 non-motor-domain NST portions of kinesin-2 proteins. Unexpectedly, we found that kinesin-2  
320 proteins contain over 20 conserved NST motifs that can be assigned into several key motif  
321 groups and are broadly shared across all superfamilies of flagellated eukaryotes. Several of these  
322 motifs had been previously recognized within a narrower phylogenetic context (De Marco et al.,  
323 2001; De Marco et al., 2003; Doodhi et al., 2009; Imanishi et al., 2006; Vukajlovic et al., 2011),  
324 while others, in particular NST motifs specific to subgroups 2A, 2B, and 2C, appear not to have  
325 been observed previously. Some motifs and motif groups were common to almost all kinesin-2  
326 taxa, while others were specific for heterotrimeric kinesins 2A/2B or homodimeric kinesin-2C  
327 taxa.

328         Although the IFT machinery is highly conserved within the kinetoplastids (van Dam et  
329 al., 2013), it was surprising that the kinetoplastid taxa did not share common kinesin-2 NST  
330 motif groups and had little evidence of conserved individual motifs (Fig. S2). Kinetoplastids are  
331 also the only kinesin-2 containing organisms identified that do not encode non-motor KAP  
332 homologs in their genomes (Julkowska and Bastin, 2009). The free-living kinetoplastid *B.*  
333 *saltans* also does not encode a KAP homolog, suggesting that it was not lost as a result of  
334 parasitism. Our MEME analysis and KAP genomic data do not support bioinformatic assignment  
335 of kinetoplastid kinesin-2 taxa as orthologs of the canonical heterotrimeric kinesin-2A or 2B  
336 forms. However, a kinetoplastid kinesin-2 protein did share a single significant kinesin-2C motif  
337 with Metazoa, which was the sole example of a homodimeric-2C motif among non-holozoan  
338 single-celled organisms. Together with the markedly different phenotypes caused by *TbKin2a*  
339 versus *TbKin2b* RNAi silencing, these data suggest that kinesin-2 proteins in *T. brucei* do not  
340 form canonical heterotrimers, but instead represent a distinct subgroup within the kinesin-2

341 family, and form homodimers or heterodimers that differ significantly in sequences and motifs  
342 and may differ in function compared with kinesin-2 proteins in other organisms.

343

344 **Trypanosome kinesin-2 proteins are important for flagellum biosynthesis.**

345 We found that silencing TbKin2a or TbKin2b results in a ~ 20% decrease in flagellum  
346 length, while silencing both causes a decrease of 40% (although flagella are present). Moreover,  
347 TbKin2a localizes along the flagellum, with a concentration on basal bodies and the proximal  
348 flagellum, similar to the localization of *C. reinhardtii* kinesin-2 FLA10 (Cole et al., 1998; Deane  
349 et al., 2001; Vashishtha et al., 1996). TbKin2a also colocalizes with both IFTB protein IFT172  
350 and IFTA protein IFT144 near basal bodies. Silencing TbKin2a decreased staining of both  
351 IFT172 and IFT144 on the flagellum and decreased the localization of IFT144, but not IFT172,  
352 to the basal body. Moreover, flagella in TbKin2a-silenced cells showed accumulation of  
353 electron-dense material along axonemes, but otherwise did not show gross flagellar  
354 abnormalities (we could not always resolve fine structural elements such as inner dynein arms,  
355 which require kinesin-2 for transport in *C. reinhardtii* (Piperno and Mead, 1997; Piperno et al.,  
356 1996)). These data suggest that TbKin2a and TbKin2B participate in IFT.

357 One distinction between TbKin2a and TbKin2b that is of potential significance is the  
358 presence of a putative C-terminal nuclear localization signal sequence in TbKin2a, but not in  
359 TbKin2b (NLS; predicted using NucPred (Brameier et al., 2007) and MultiLoc2 (Blum et al.,  
360 2009)); this sequence might also function as a ciliary localization signal sequence (CLS) (Verhey  
361 et al., 2011). For the homodimeric kinesin-2 protein KIF17, an NLS/CLS mediates entry into the  
362 ciliary compartment (Dishinger et al., 2010; Kee et al., 2012). Thus, TbKin2a and TbKin2b may  
363 play different roles in cargo entry into flagella. Recent investigations in *C. elegans* indicate that



364 heterotrimeric kinesin-2A/2B is primarily responsible for cargo entry into the flagellum  
365 transition zone. Following cargo entry, kinesin-2A/2B gradually undocks while homodimeric  
366 kinesin-2C docks in the proximal segment. Finally, kinesin-2C becomes the primary transport  
367 motor in the distal segment (Prevo et al., 2015). By analogy, TbKin2a and TbKin2b may play  
368 different roles in cargo transport at different regions of the flagellum.

369 In many other organisms, kinesin-2 proteins are essential for both flagellum biogenesis  
370 and maintenance (Lechtreck, 2015; Scholey, 2013). However, in BSF *T. brucei* silencing  
371 kinesin-2 proteins resulted in partial but not complete inhibition of flagellum biosynthesis and  
372 maintenance. This may be due to incomplete RNAi silencing, slow protein turnover, the presence  
373 of other kinesins that participate in flagellum biosynthesis and maintenance, or increasingly  
374 pleiotropic effects of RNAi over time on other processes in BSF cells such as cell-cycle  
375 progression, which result in inhibition of cellular functions, or cell death before flagellar  
376 shortening is complete (Blaineau et al., 2007; Broadhead et al., 2006; Chan and Ersfeld, 2010;  
377 Demonchy et al., 2009; Marande and Kohl, 2011; Wickstead et al., 2010a). Interestingly, in PCF  
378 *T. brucei* a recent study revealed that IFT is active in both new and old flagella, but that silencing  
379 either anterograde IFTB or retrograde IFTA components caused a failure in new flagellum  
380 biosynthesis (although with somewhat different phenotypes) but no defect in old flagellum  
381 maintenance (Fort et al., 2016). Our results are consistent with a role for kinesin-2 proteins in  
382 anterograde IFT during new flagellum biosynthesis. However, the fact that we do not observe a  
383 sub-population of flagella that remain long in TbKin2a/TbKin2b-silenced BSF *T. brucei* suggests  
384 that TbKin2a and TbKin2b may be important for flagellar maintenance in BSF cells.

385

386 **TbKin2a is essential for cell proliferation.**

387           Interestingly, silencing TbKin2a expression caused a cessation of cell proliferation  
388 beginning at ~ 24 hpi, whereas silencing TbKin2b expression had no apparent effect on cell  
389 proliferation. Silencing TbKin2a also caused a failure in cytokinesis, with the accumulation of  
390 greatly enlarged cells with multiple nuclei, kinetoplasts, basal bodies, FAZ, and flagella, as well  
391 as decreased cell motility. It is surprising that only TbKin2a is important for proliferation,  
392 cytokinesis and motility, although both TbKin2a and TbKin2b contribute to flagellar length. This  
393 suggests that flagellar length is flexible to decreases of at least 20% and that shorter flagella in  
394 BSF cells can be functional, perhaps through a compensatory mechanism such as decreased cell  
395 size, as in PCF *T. brucei* (Kohl et al., 2003).

396           The cell proliferation defects caused by silencing TbKin2a in BSF cells are similar at a  
397 gross level to the defects caused by RNAi silencing of other flagellar proteins, FAZ proteins, and  
398 basal body proteins (Broadhead et al., 2006; LaCount et al., 2002; Morris et al., 2001; Ralston et  
399 al., 2006), as well as cell-cycle-related proteins, other signaling proteins, and cell-surface  
400 proteins (reviewed in (Farr and Gull, 2012; Hammarton et al., 2007b)). The commonality of  
401 phenotypes is specific to BSF cells and may be due to the fact that silencing these factors directly  
402 or indirectly impacts cytokinesis (Hammarton et al., 2007b; Zhou et al., 2014). It remains  
403 possible that, in PCF cells, the functions of TbKin2a and TbKin2b are distinct.

404           It has been hypothesized that cell proliferation and cytokinesis defects in BSF  
405 trypanosomes can result from inhibited flagellar beating (Broadhead et al., 2006; Ralston and  
406 Hill, 2006). However, defects in flagellar beating may not explain the cell proliferation and  
407 cytokinesis phenotypes observed in TbKin2a-silenced cells for several reasons. First, normal  
408 flagellar beating is not essential for cytokinesis, because the cell proliferation and cytokinesis  
409 defects caused by silencing dynein light chain 1 by RNAi can be rescued by the expression of

410 site-specific mutants that are still defective in flagellar motility (Kisalu et al., 2014; Ralston et  
411 al., 2011). Second, silencing TbKin2a did not cause gross ultrastructural abnormalities in flagella  
412 or the flagellar pocket other than abnormal IFT train accumulation, in contrast to the major  
413 defects caused by silencing other flagellar proteins PFR2, TAX-1, TAX-2, DIGIT, or TbMBO2  
414 (Broadhead et al., 2006; Farr and Gull, 2009). Third, we find that following TbKin2a RNAi  
415 induction, the kinetics of onset of the cytokinesis defect precedes the defect in cell motility. For  
416 example, at 16-20 hpi, abnormal cells with bundled flagella and FAZ at their anterior ends are  
417 observed, suggesting a defect in cytokinesis initiation. Abnormal cells are also observed  
418 connected at their posterior ends, suggesting a defect in cell scission. At 24 hpi, cell proliferation  
419 is affected, and there is a decrease in motility although the flagella continue to beat. These  
420 considerations suggest that TbKin2a may play a role in cytokinesis initiation that is independent  
421 of any role in flagellar motility. This may be due to its involvement in transporting cargoes into  
422 flagella that themselves are important for cytokinesis or its on the FAZ, as discussed below.

423

#### 424 **Implications of TbKin2a localization on the FAZ.**

425 It is intriguing that TbKin2a also localizes to the FAZ. However, TbKin2a does not  
426 appear to be important in the construction, maintenance, or structure of the FAZ because we did  
427 not observe abnormalities in the FAZ or flagellar detachment in TbKin2a or TbKin2a2b-silenced  
428 cells. Instead, we propose that TbKin2a interacts with the FAZ via the MtQ and may transport  
429 other cargoes, including those essential for cell division. This also the simplest model, given the  
430 ability of TbKin2a to bind to microtubules. Because MtQ microtubules are uniformly oriented  
431 with their plus ends towards the cell anterior (Gull, 1999), antiparallel to the remainder of the  
432 subpellicular array (Robinson et al., 1995), they represent a potential track for moving cargoes

433 along the anterior-posterior cell axis.

434         We speculate that cargoes transported by TbKin2a along the FAZ could include both  
435 organelles and cell cycle regulatory molecules. Recent studies have revealed that the FAZ is  
436 linked with other single-copy organelles including the kinetoplast, tripartite attachment complex  
437 (TAC), basal body, flagellum, flagellar pocket collar, and bilobe structure with ER and Golgi  
438 exit sites (Gadelha et al., 2009; Gheiratmand et al., 2013; Gluenz et al., 2011; Lacomble et al.,  
439 2009; Lacomble et al., 2010; Sunter et al., 2015; Zhou et al., 2015). TbKin2a may be involved in  
440 transporting components involved in these interactions. For example, basal bodies and  
441 kinetoplasts are connected by the TAC (Ogbadoyi et al., 2003), and basal body duplication and  
442 separation are necessary for kinetoplast segregation (Robinson and Gull, 1991). We observed  
443 defects in kinetoplast separation and basal body to kinetoplast attachment in TbKin2a-silenced  
444 cells, suggesting that TbKin2a may participate in TAC assembly or maintenance. TbKin2a may  
445 also be important for the transport of structural or regulatory proteins that are important for cell  
446 cycle regulation as well as duplication and segregation of many of the above-mentioned  
447 components, which include the centrins 1, 2, and 4 (Selvapandiyan et al., 2007; Shi et al., 2008;  
448 Wang et al., 2012) as well as polo-like kinase (TbPLK) (de Graffenried et al., 2013; de  
449 Graffenried et al., 2008; Ikeda and de Graffenried, 2012; Li et al., 2010; Umeyama and Wang,  
450 2008). Notably, TbPLK is transported along the FAZ to the cell's anterior tip (Ikeda and de  
451 Graffenried, 2012; Li et al., 2010; Sun and Wang, 2011; Yu et al., 2012), where it is required for  
452 cytokinesis initiation (Hammarton et al., 2007a; Kumar and Wang, 2006). Future experiments  
453 will be aimed at determining whether TbKin2a and TbKin2b transport distinct cargoes along the  
454 flagellum and/or FAZ, and how cargo transport contributes to flagellum construction, organelle  
455 transport and positioning, and cytokinesis.

## 456 **Materials and Methods**

### 457 **MEME suite analysis**

458 Multiple EM for Motif Elicitation (MEME) web-based software (Bailey and Elkan, 1994; Bailey  
459 and Gribskov, 1998; Bailey et al., 2009; Bailey et al., 2006) (versions 3.91-4.11) was used to  
460 analyze the NST domains of putative kinesin-2 proteins. Using kinesin-2 taxa identified in a  
461 phylogenetic analysis of kinesin motor domain sequences from 45 diverse organisms (Wickstead  
462 et al., 2010b) as starting point, we carried out more than 80 independent MEME computational  
463 runs including multiple combinations of kinesin-2 NST data subsets and input parameters with  
464 multiple controls. To ensure that all NST domains consistently included a full neck region, which  
465 has been shown to evolve independently of the motor domain (Case et al., 2000; Vale and  
466 Fletterick, 1997), our NST domain for each taxon began with the final 3 amino acids (positions  
467 343-345) of the PFAM-defined motor domain sequence specification (PFAM00225). MEME  
468 results were sensitive to changes in inputs and assumptions including composition, length and  
469 number of protein sequences, expected motif distribution and run parameters. To overcome this  
470 sensitivity, many runs of kinesin-2 sequences as well as control sequences were conducted until  
471 consistent result patterns were observed. Our controls included running a full MEME analysis of:  
472 kinesin-1 family NST sequences; kinesin-1, -3 and -4 family neck domain sequences;  
473 kinetoplastid and non-kinetoplastid kinesin NST sequences; and scrambled kinesin-2 NST  
474 sequences (NST sequences are found in Supplemental Table S4). Overall results were generally  
475 robust and consistent but as already noted, could vary from run to run. Kinesin-2 NST motif  
476 results presented here are from a single (MEME 83) that we judged to be highly consistent with  
477 overall result patterns. All MEME statistics presented were generated by standard MEME  
478 programs (Bailey and Elkan, 1994; see Supplemental Figures S1-S2, Supplemental Table S3).

479

## 480 **Cell culture and RNA interference**

481           BSF *T. brucei brucei* Lister 427-derived cell line 90-13 (Wirtz et al., 1999) was cultured  
482 and maintained as described previously (Li and Wang, 2006; Tu and Wang, 2004), with splitting  
483 of the cultures at final densities of  $\sim 1.0 \times 10^6$  cells/ml. For RNAi, DNA corresponding to 380-bp  
484 *T. brucei* gene Tb927.5.2090 (TbKin2a) or 462-bp gene Tb927.11.13920 (TbKin2b) (selected  
485 using RNAi software; (Redmond et al., 2003)) were amplified by PCR from genomic DNA  
486 (primers listed in Table S5). For RNAi of TbKin2a or TbKin2b, PCR fragments were ligated into  
487 the XhoI and HindIII sites of pZJM (Wang et al., 2000). For RNAi of both TbKin2a and  
488 TbKin2b, the TbKin2b PCR product was ligated into the XbaI and XhoI sites in pZJM that  
489 already contained TbKin2a. All DNA sequences were verified. Transfections (Burkard et al.,  
490 2007; Li and Wang, 2006) and selection of monoclonal transformants were performed using  
491 agarose plates as described previously (Carruthers and Cross, 1992; Tan et al., 2002). For  
492 induction of RNAi, monoclonal transformants were cultured with 1  $\mu$ g/ml tetracycline for 0-96 h  
493 as indicated. A list of primers used is found in Supplemental Table S5. For growth curves, live  
494 cells were counted using a hemocytometer.

495

## 496 **Antibody generation and immunoblotting**

497           A portion of the TbKin2a gene encoding amino acids 391–696 plus a C-terminal 6XHis  
498 tag (TbKin2a.391-696-His) was amplified by PCR using primers listed in Table S5, ligated into  
499 the NcoI and NotI sites in pET22b(+) (Novagen, Madison, WI), and verified by DNA  
500 sequencing. Recombinant TbKin2a.391-696-His was expressed in *E. coli* BL21-CodonPlus-RP  
501 cells (Agilent Technologies, Cedar Creek, TX) after induction with 400- $\mu$ M IPTG at 37°C for 2

502 h. The protein was purified by Ni-NTA (Qiagen, Valencia, CA) affinity chromatography  
503 followed by gel filtration chromatography on a Superdex 75 column (GE Healthcare,  
504 Piscataway, NJ). To generate anti-TbKin2a antibody, rabbits were immunized by Covance Inc.  
505 (Princeton, NJ) using purified TbKin2a.391-696-His. Antibody was affinity purified using  
506 standard procedures. For immunoblotting, affinity-purified anti-TbKin2a antibody was used at a  
507 dilution of 1:10,000, and YL 1/2 rat monoclonal anti-tyrosylated  $\alpha$ -tubulin antibody (Millipore,  
508 Billerica, MA) and/or KMX mouse anti- $\beta$ -tubulin antibody (Birkett et al., 1985) were used at a  
509 dilution of 1:100.

510

#### 511 **RT-PCR and qRT-PCR**

512 For all RT-PCR and qRT-PCR studies, total RNA (from at least two independent  
513 biological replicates) was extracted and isolated individually for each experiment from freshly  
514 spun-down, unwashed *T. brucei* BSF RNAi cells (induced or uninduced) using either TRI  
515 Reagent or RNazol (Molecular Research Center (MRC), Cincinnati OH). RNA for semi-  
516 quantitative RT-PCR was purified after isolation using MRC RNA precipitation protocols,  
517 including a DNase treatment step using TurboDNase (Thermo Scientific). For quantitative  
518 qRT-PCR from RNAi cells, RNA extracted and isolated as above from n = 4 (TbKin-2a), n = 2  
519 (TbKin2b), and n = 4 (TbKin2a2b) biological experiments was individually purified either as  
520 above, or by immobilizing extracted and isolated RNA on silica columns (Direct-zol, Zymo  
521 Research (ZR), Carlsberg, CA), treating with DNase, and purifying, all as described in the  
522 manufacturer's protocols (except that an additional wash step of 100% ethanol was included) and  
523 as a final step, eluted with pure DEPC water. Purified RNA in DEPC water was analyzed using a  
524 Nanodrop spectrophotometer (Thermo Scientific) and stored at -80°C. For qRT-PCR, purified

525 RNA integrity for each sample was confirmed using an Agilent Bioanalyzer 2100 (Agilent  
526 Technologies, Santa Clara, CA) at the UC Berkeley QB3 Functional Genomics Laboratory. All  
527 primers were from Integrated DNA Technologies (Coralville, IA) (Table S5). For semi-  
528 quantitative RT-PCR, first-strand cDNAs were generated from RNA using SuperScript III First-  
529 Strand Synthesis System (Thermo Scientific) with oligo(dT) primers, and PCR was performed  
530 using first-strand cDNA and with gene-specific primers. qRT-PCR used a two-step procedure  
531 with first-strand cDNAs generated from purified RNA using a Superscript VILO cDNA  
532 Synthesis Kit (Thermo Scientific). We evaluated *T. brucei* potential reference standard genes as  
533 recommended previously (Brenndörfer and Boshart, 2010). Only one gene, TERT (telomerase  
534 reverse transcriptase, Tb927.11.10190), had minimal expression variation under our  
535 experimental conditions and was selected as sole reference standard. All qPCR work was  
536 performed in 96-well plates using either Applied Biosystems (ABI) 7500 Fast Real-Time PCR  
537 System and iTaq SYBR Green Supermix (Thermo Scientific); or Roche LightCycler96 System  
538 using iQ SYBR Green Master Mix (BioRad, Inc., Richmond, CA) using separate wells for  
539 reference and target reactions. Primers for qRT-PCR were designed using ABI Primer Express  
540 Version 2.0 software and/ or Primer3 software (Untergasser et al., 2012). Amplification  
541 efficiency of each gene/primer combination was confirmed over a 4- to 5-log dilution series.  
542 Relative gene expression for qRT-PCR was determined for each biological experiment, and  
543 results were aggregated using the  $2^{-\Delta\Delta C_T}$  method (Schmittgen and Livak, 2008).

544

#### 545 **Fluorescence activated cell sorting**

546 Cell samples for fluorescence-activated cell sorting (FACS) were prepared as described  
547 previously (Tu and Wang, 2004). FACS was carried out using an Epics XL flow cytometer



548 (Beckman Coulter, Brea, CA). Data were analyzed using FlowJo 4-5 software (Tree Star,  
549 Ashland, OR).

550

### 551 **Motility assays**

552 At experiment initiation, cells were centrifuged and transferred to 1–10 ml of fresh  
553 settling media (a 50/50 v/v mix of heat-treated tetracycline-free fetal bovine serum (Atlanta  
554 Biologicals, Flowery Branch, GA) and regular complete HMI-9 media (Engstler et al., 2007) at  
555 starting densities of  $\sim 0.5\text{--}3 \times 10^5$  cells/ml, with or without tetracycline at 37°C with 5% CO<sub>2</sub>.  
556 Using previously described methods, including media replacement at 12-24 h intervals (Hesse et  
557 al., 1995), un-induced cells were grown in settling media for up to 48 h and reached final  
558 densities of up to  $\sim 3 \times 10^7$  cells/ml. At 18, 24 or 36 h after growth in the settling media and  
559 RNAi induction, cells were counted and 1 ml of cells was transferred into each of 2 paired  
560 cuvettes and sealed with sterile, gas-permeable film. Cuvettes were agitated and the initial  $A_{600\text{nm}}$   
561 at 0 min was measured using a SpectraMax M2 multi-detection reader (Molecular Devices,  
562 Sunnyvale, CA) or Genesys 10 spectrophotometer (Thermo Fisher Scientific, Waltham, MA).  
563 Cuvettes were incubated at 37°C with 5% CO<sub>2</sub>, and at each subsequent time point (every 1–2 h  
564 up to 8 h), cuvettes were removed from the incubator, and one of each pair was agitated again,  
565 while the other remained still.  $A_{600\text{nm}}$  measurements were obtained and differences in absorbance  
566 were calculated.

567

### 568 **Staining for fluorescence microscopy**

569 Except for counts of nuclei/kinetoplast morphology, for all immunofluorescence  
570 microscopy, live cells were either (i) centrifuged at 600-1200 x g and diluted in 37°C fresh HMI-

571 9 complete media or HBS/G (25 mM HEPES pH 7.1, 140 mM NaCl, 5 mM KCl, 0.75 mM  
572 Na<sub>2</sub>HPO<sub>4</sub>, 22 mM glucose) to 1.5–2.0 × 10<sup>6</sup> cells/ml, or (ii) if too fragile to centrifuge (for some  
573 RNAi cells), then cells at 0.5–1.2 × 10<sup>6</sup> cells/ml were settled directly onto poly-L-lysine  
574 (Amanda Polymers, Birmingham, AL) coated coverslips (#1.5 high precision-type). For F/M-  
575 type fixation, cells on coverslips were washed 1–2× in HBS/G, then fixed immediately in HBS/G  
576 buffer with freshly added formaldehyde (Ted Pella, Inc.) at 0.75% to 4% for 5–10 min at room  
577 temperature, washed 2–3x in HBS/G, placed on ice, and then fixed with -20°C methanol for 5–7  
578 min, followed by 3–5× washes in PEME (100 mM PIPES pH6.9, 2 mM EGTA, 1 mM Mg<sub>2</sub>SO<sub>4</sub>,  
579 0.5 mM EDTA) (Robinson et al., 1991) and a 5–10 min rehydration in PEME. For methanol-  
580 only fixation (including flagellar length or intensity measurements), cells on coverslips were  
581 washed 1–2× in HBS/G, placed on ice and fixed in -20°C 100% methanol for 10–20 min,  
582 followed by PEME washing and rehydration steps as above. Detergent extraction was carried out  
583 before fixation on live unfixed cells at room temperature using the Nonidet P-40 method  
584 described previously (Robinson et al., 1991), except that live cells were settled onto and  
585 extracted on poly-L-lysine-coated coverslips; IGEPAL CA-630 was substituted for Nonidet P-40  
586 at equal concentrations; extracted cytoskeletons were stabilized in 2× cComplete™ protease  
587 inhibitor cocktail, EDTA-free (Roche Diagnostics), plus 1 mM E 64d cysteine protease inhibitor  
588 (Apex Biotechnology, Taiwan). All buffers used prior to fixation were supplemented with 5 mM  
589 ATP (molecular biology grade, Sigma) and 2 mM MgCl<sub>2</sub>. Cells were permeabilized, blocked and  
590 incubated in primary and secondary antibodies as described (Sagolla et al., 2006) at the  
591 following concentrations: L8C4 (Kohl et al., 1999), 1:100; KMX (Birkett et al., 1985), 1:25-  
592 1:50; L3B2 mouse anti-FAZ (Kohl et al., 1999), 1:50; YL1/2 (EMD Millipore, Darmstadt,  
593 Germany), 1:100; BBA4 mouse monoclonal anti-basal-body (Woods et al., 1989), 1:50; L1C6

594 mouse anti-nucleolar protein (Durand-Dubief and Bastin, 2003), 1:200; mouse anti-IFT144  
595 (PIFTF6) (Absalon et al., 2008), 1:200; mouse anti-IFT172 (Absalon et al., 2008), 1:1,000;  
596 rabbit anti-TbKin2a (this study), 1:20,000. Secondary antibodies conjugated to AlexaFluor 488  
597 or AlexaFluor 568 (Invitrogen) were diluted at 1:400 with DAPI at 2.5 ng/ml. For double  
598 staining with mouse anti-IFT172 and mouse L3B2, anti-IFT172 was labeled with Zenon  
599 AlexaFluor 488 (Invitrogen) and used at a 1:1000 dilution, and L3B2 was labeled using Zenon  
600 AlexaFluor 568 (Invitrogen) and used at 1:10, using the recommended Zenon protocol.  
601 Coverslips were mounted onto slides using ProLong Gold antifade.

602 For nuclei and kinetoplast morphology counts,  $0.7\text{--}2.0 \times 10^7$  live cells were centrifuged,  
603 washed in PBS/G (PBS with 20 mM glucose) then fixed with 4% formaldehyde for 20–30 min.  
604 Fixed cells were isolated by centrifugation, washed in PBS, placed on poly-L-lysine-coated  
605 coverslips and post-fixed with  $-20^\circ\text{C}$  methanol for 20–30 min. Fixed cells on coverslips were  
606 permeabilized and blocked in PBS with 1% bovine serum albumin (BSA) and 0.1% Triton X-  
607 100 for 1 h. For staining, cells were incubated with mouse anti-PFR L8C4 antibody (Kohl et al.,  
608 1999) at 1:50 in PBS with 1% BSA and then with AlexaFluor 488 anti-mouse secondary  
609 antibody (Invitrogen) and DAPI (2.5 ng/ml). Samples were mounted using ProLong Gold  
610 antifade (Invitrogen) and allowed to hard set in dark at  $4^\circ\text{C}$  for at least 24 h, and sealed with  
611 clear nail polish before imaging.

612

### 613 **Shear Method for separating flagella from FAZ**

614 We devised a simple parallel-plate flow chamber device and shearing procedure to apply  
615 measured, consistent shear forces.  $24 \times 40$  mm poly-L-lysine coated #1.5 high-precision  
616 coverslips were pre-weighed dry, then fully fixed cells (see staining for fluorescence

617 microscopy) were added, coverslips were mounted onto a cleaned glass slide with 50–120  $\mu$ l  
618 ProLong Gold antifade (Invitrogen), and the assembly was placed into a mounting slot in the  
619 device base, which had been levelled and clamped in place and maintained at room temperature.  
620 Coverslips were re-weighed after each step above. A 25 x 50 mm glass slide top-plate, with or  
621 without attached weights (total top plate mass as used ranged from 7.55g – 10.52g) was loaded  
622 carefully onto the coverslip, flush along the back side, between device guides. All masses were  
623 determined using a single, calibrated, fully-enclosed Mettler Toledo AB54 S analytical balance.  
624 Using a stopwatch and pusher rod placed directly at the back of the coverslip, the coverslip and  
625 top plate assembly was pushed by hand in a single direction at a constant velocity of  $\sim$ 0.7 - 1  
626 mm/s for 4-5 s over a measured distance of  $\sim$ 4-5 mm. Immediately before and after the above-  
627 mentioned steps, clean, dry pre-weighed Kimwipes (Kimberly-Clark, Roswell, GA) held in  
628 micro-forceps were used to blot-up excess liquid and immediately reweighed, with all before and  
629 after wipe masses recorded. Shear-treated coverslips were then allowed to set in dark at 4° C, and  
630 sealed as per Staining for Fluorescence Microscopy.

631

### 632 **Microscopy and image analysis**

633 Epifluorescence microscopy was performed using an Olympus IX71 microscope with  
634 60 $\times$  (1.40 NA) and 100 $\times$  (1.35 NA) PlanApo objectives and a Coolsnap HQ camera  
635 (Photometrics, Tucson, AZ). Images were captured using Metamorph (Molecular Devices) or  
636  $\mu$ Manager software (Edelstein et al., 2010). Brightness/contrast levels were adjusted using  
637 ImageJ and Image-J2/Fiji (Schneider et al., 2012) and Photoshop CS3 software (Adobe, San  
638 Jose, CA). For flagellar intensity measurements, ImageJ/J2 were used to measure mean  
639 fluorescence intensity at 0.1-mm intervals along 53 individual mature flagella (i.e., data do not

640 include new flagella) on methanol-fixed cells from 3 independent experiments. For flagellar  
641 length measurements, ImageJ/J2 were used to measure lengths of PFR (stained with L8C4) in  
642 uninduced and induced methanol-fixed cells from 4 independent experiments.

643 Deconvolution microscopy was carried out using a DeltaVision Elite microscope (GE  
644 Healthcare Life Sciences, Pittsburgh, PA) with Olympus UPlanApo 100× (1.35 NA) or  
645 UPlanApo 60× (1.40 NA) objectives and Coolsnap ES<sup>2</sup> camera (Photometrics). Images were  
646 captured using SoftWoRx v6 software (GE Healthcare). From 40-200 serial z-sections per  
647 channel were acquired at 0.10–0.40- $\mu$ m intervals. Image z-stacks were deconvolved using  
648 Huygens Professional v14 (Scientific Volume Imaging B.V., Hilversum, Netherlands) or  
649 SoftWoRx software (“deconvolved stacks”). Images were analyzed using Imaris v7 (Bitplane,  
650 Zurich, Switzerland), and Image-J/J2. Two-dimensional projection images were generated from  
651 three-dimensional deconvolved stacks using Imaris, ImageJ/J2, Huygens Professional or  
652 SoftWoRx. Image adjustments required for presentation were made using ImageJ/J2 and  
653 Photoshop. For colocalization analysis with BBA4, IFT172, IFT144, TbKin2a and DNA, Imaris  
654 v7 ImarisColoc was used on deconvolved z-stack data, and statistics were computed using Imaris  
655 v7 and Prism 6. Threshold intensity levels for each channel were analyzed for relative sensitivity  
656 of colocalization statistics to lower boundary thresholds ranging from 2--20% of maximum  
657 intensity, and were generally set at 10% of the maximum intensity for that channel.

658 For transmission electron microscopy (TEM), cells were processed as previously  
659 described (Tu et al., 2005), and were imaged using a JEOL 1200 transmission electron  
660 microscope.

661

662 **Statistical analyses**

663 Quantitative data was calculated and graphed using Prism 6 (GraphPad Software, La  
664 Jolla, CA). Sample sizes (n) were sufficient to detect statistical significance at the levels  
665 indicated. For Figure 6A, the relative length statistics were computed using one-way analysis of  
666 variance (ANOVA) with Bonferroni's multiple comparison test in Prism 6. For Figure 6G,  
667 settling data statistics were computed using two-way ANOVA with Bonferroni's post tests in  
668 Prism 6. Statistical significance was measured used two-tailed distribution tests.

669

## 670 **Acknowledgements**

671 We particularly thank C.C. Wang, and former members of the Wang lab at UCSF: Ziyin Li,  
672 Xiaoming Tu, Stephane Gourguechon, Praveen Kumar, and others, for reagents, procedures,  
673 unpublished observations, draft manuscript review (C.C.W. and Z.L.), insights, advice, and  
674 encouragement. We thank Philippe Bastin, Benjamin Morga, and Thierry Blisnick of the Pasteur  
675 Institute for antibodies to IFT172 and IFT144, unpublished images, insights, and suggestions.  
676 We thank Scott Dawson at UC Davis for extensive insights and advice on phylogenetic methods  
677 and interpretation. We thank Ryan Case for insights and suggestions regarding bioinformatic  
678 analysis of kinesins. We thank the following individuals for reagents: Keith Gull at Oxford  
679 University for antibodies (KMX, L8C4, L1B6, L3B2 and BBA4), Paul Englund at Johns  
680 Hopkins University for the pZJM vector, and George Cross at Rockefeller University for the 90-  
681 13 cell line. We thank Denise Schichnes and Steve Ruzin of the UC Berkeley Biological Imaging  
682 Facility for assistance with microscopy, image processing, and colocalization. Finally, we thank  
683 Anna Albisetti for comments on the manuscript, and current and former Welch Lab members for  
684 their suggestions, support, and patience.

685

686 **Competing interests**

687 No competing or financial interests declared.

688

689 **Author contributions**

690 R.L.D., B.M.H., and M.D.W. conceived the experiments. R.L.D., B.M.H., H.W., R.L.J., J.M.

691 W.Z.C., and M.D.W. designed the experiments. R.L.D., B.M.H., H.W., R.L.J., and J.M.

692 executed the experiments. R.L.D., B.M.H., W.Z.C., H.W., and M.D.W. interpreted the findings

693 being published. R.L.D. and M.D.W. drafted and revised the article.

694

695 **Funding**

696 This work was funded in part by grant A40732 from the UNDP/World Bank/WHO Special

697 Programme for Research and Training In Tropical Diseases (TDR). Funding was also provided

698 by R.L.D., including through a family trust.

699

## 700 References

- 701 **Absalon, S., Blisnick, T., Kohl, L., Toutirais, G., Doré, G., Julkowska, D., Tavenet, A. and**  
702 **Bastin, P.** (2008). Intraflagellar transport and functional analysis of genes required for  
703 flagellum formation in trypanosomes. *Mol Biol Cell* **19**, 929–944.
- 704 **Adhiambo, C., Blisnick, T., Toutirais, G., Delannoy, E. and Bastin, P.** (2009). A novel  
705 function for the atypical small G protein Rab-like 5 in the assembly of the trypanosome  
706 flagellum. *J Cell Sci* **122**, 834–841.
- 707 **Adl, S. M., Simpson, A. G. B., Lane, C. E., Lukeš, J., Bass, D., Bowser, S. S., Brown, M. W.,**  
708 **Burki, F., Dunthorn, M., Hampl, V., et al.** (2012). The revised classification of eukaryotes.  
709 *J Eukaryot Microbiol* **59**, 429–493.
- 710 **Bailey, T. L. and Elkan, C.** (1994). Fitting a mixture model by expectation maximization to  
711 discover motifs in biopolymers. *Proc Int Conf Intell Syst Mol Biol* **2**, 28–36.
- 712 **Bailey, T. L. and Gribskov, M.** (1998). Methods and statistics for combining motif match  
713 scores. *J. Comput. Biol.* **5**, 211–221.
- 714 **Bailey, T. L., Boden, M., Buske, F. A., Frith, M., Grant, C. E., Clementi, L., Ren, J., Li, W.**  
715 **W. and Noble, W. S.** (2009). MEME SUITE: tools for motif discovery and searching.  
716 *Nucleic Acids Res.* **37**, W202–8.
- 717 **Bailey, T. L., Williams, N., Misleh, C. and Li, W. W.** (2006). MEME: discovering and  
718 analyzing DNA and protein sequence motifs. *Nucleic Acids Res.* **34**, W369–73.
- 719 **Bastin, P., Pullen, T. J., Sherwin, T. and Gull, K.** (1999). Protein transport and flagellum  
720 assembly dynamics revealed by analysis of the paralysed trypanosome mutant *snl-1*. *J Cell*  
721 *Sci* **112 ( Pt 21)**, 3769–3777.
- 722 **Berriman, M., Ghedin, E., Hertz-Fowler, C., Blandin, G., Renaud, H., Bartholomeu, D. C.,**  
723 **Lennard, N. J., Caler, E., Hamlin, N. E., Haas, B., et al.** (2005). The genome of the  
724 African trypanosome *Trypanosoma brucei*. *Science* **309**, 416–422.
- 725 **Birkett, C. R., Foster, K. E., Johnson, L. and Gull, K.** (1985). Use of monoclonal antibodies  
726 to analyse the expression of a multi-tubulin family. *FEBS Lett* **187**, 211–218.
- 727 **Blaineau, C., Tessier, M., Dubessay, P., Tasse, L., Crobu, L., Pagès, M. and Bastien, P.**  
728 (2007). A novel microtubule-depolymerizing kinesin involved in length control of a  
729 eukaryotic flagellum. *Curr Biol* **17**, 778–782.
- 730 **Blisnick, T., Buisson, J., Absalon, S., Marie, A., Cayet, N. and Bastin, P.** (2014). The  
731 intraflagellar transport dynein complex of trypanosomes is made of a heterodimer of dynein  
732 heavy chains and of light and intermediate chains of distinct functions. *Mol Biol Cell* **25**,  
733 2620–2633.
- 734 **Blum, T., Briesemeister, S. and Kohlbacher, O.** (2009). MultiLoc2: integrating phylogeny and



- 735 Gene Ontology terms improves subcellular protein localization prediction. *BMC*  
736 *Bioinformatics* **10**, 274.
- 737 **Brameier, M., Krings, A. and MacCallum, R. M.** (2007). NucPred--predicting nuclear  
738 localization of proteins. *Bioinformatics* **23**, 1159–1160.
- 739 **Brenndörfer, M. and Boshart, M.** (2010). Selection of reference genes for mRNA  
740 quantification in *Trypanosoma brucei*. *Mol Biochem Parasitol* **172**, 52–55.
- 741 **Broadhead, R., Dawe, H. R., Farr, H., Griffiths, S., Hart, S. R., Portman, N., Shaw, M. K.,**  
742 **Ginger, M. L., Gaskell, S. J., McKean, P. G., et al.** (2006). Flagellar motility is required  
743 for the viability of the bloodstream trypanosome. *Nature* **440**, 224–227.
- 744 **Brown, A. K., Hunt, S. D. and Stephens, D. J.** (2014). Opposing microtubule motors control  
745 motility, morphology and cargo segregation during ER-to-Golgi transport. *Biol Open* **3**, 307–  
746 313.
- 747 **Brown, J. M., Marsala, C., Kosoy, R. and Gaertig, J.** (1999). Kinesin-II is preferentially  
748 targeted to assembling cilia and is required for ciliogenesis and normal cytokinesis in  
749 *Tetrahymena*. *Mol Biol Cell* **10**, 3081–3096.
- 750 **Brun, R., Blum, J., Chappuis, F. and Burri, C.** (2010). Human African trypanosomiasis.  
751 *Lancet* **375**, 148–159.
- 752 **Buisson, J., Chenouard, N., Lagache, T., Blisnick, T., Olivo-Marin, J.-C. and Bastin, P.**  
753 (2013). Intraflagellar transport proteins cycle between the flagellum and its base. *J Cell Sci*  
754 **126**, 327–338.
- 755 **Burkard, G., Fragoso, C. M. and Roditi, I.** (2007). Highly efficient stable transformation of  
756 bloodstream forms of *Trypanosoma brucei*. *Mol Biochem Parasitol* **153**, 220–223.
- 757 **Carruthers, V. B. and Cross, G. A.** (1992). High-efficiency clonal growth of bloodstream- and  
758 insect-form *Trypanosoma brucei* on agarose plates. *Proc Natl Acad Sci U S A* **89**, 8818–  
759 8821.
- 760 **Case, R. B., Rice, S., Hart, C. L., Ly, B. and Vale, R. D.** (2000). Role of the kinesin neck  
761 linker and catalytic core in microtubule-based motility. *Curr Biol* **10**, 157–160.
- 762 **Chan, K. Y. and Ersfeld, K.** (2010). The role of the Kinesin-13 family protein TbKif13-2 in  
763 flagellar length control of *Trypanosoma brucei*. *Mol Biochem Parasitol* **174**, 137–140.
- 764 **Cole, D. G., Chinn, S. W., Wedaman, K. P., Hall, K., Vuong, T. and Scholey, J. M.** (1993).  
765 Novel heterotrimeric kinesin-related protein purified from sea urchin eggs. *Nature* **366**, 268–  
766 270.
- 767 **Cole, D. G., Diener, D. R., Himelblau, A. L., Beech, P. L., Fuster, J. C. and Rosenbaum, J.**  
768 **L.** (1998). Chlamydomonas kinesin-II-dependent intraflagellar transport (IFT): IFT particles  
769 contain proteins required for ciliary assembly in *Caenorhabditis elegans* sensory neurons. *J*

- 770 *Cell Biol* **141**, 993–1008.
- 771 **de Graffenried, C. L., Anrather, D., Raußendorf, Von, F. and Warren, G.** (2013). Polo-like  
772 kinase phosphorylation of bilobe-resident TbCentrin2 facilitates flagellar inheritance in  
773 *Trypanosoma brucei*. *Mol Biol Cell* **24**, 1947–1963.
- 774 **de Graffenried, C. L., Ho, H. H. and Warren, G.** (2008). Polo-like kinase is required for Golgi  
775 and bilobe biogenesis in *Trypanosoma brucei*. *J Cell Biol* **181**, 431–438.
- 776 **De Marco, V., Burkhard, P., Le Bot, N., Vernos, I. and Hoenger, A.** (2001). Analysis of  
777 heterodimer formation by Xklp3A/B, a newly cloned kinesin-II from *Xenopus laevis*. *EMBO*  
778 *J* **20**, 3370–3379.
- 779 **De Marco, V., De Marco, A., Goldie, K. N., Correia, J. J. and Hoenger, A.** (2003).  
780 Dimerization properties of a *Xenopus laevis* kinesin-II carboxy-terminal stalk fragment.  
781 *EMBO Rep* **4**, 717–722.
- 782 **Deane, J. A., Cole, D. G., Seeley, E. S., Diener, D. R. and Rosenbaum, J. L.** (2001).  
783 Localization of intraflagellar transport protein IFT52 identifies basal body transitional fibers  
784 as the docking site for IFT particles. *Curr Biol* **11**, 1586–1590.
- 785 **Demonchy, R., Blisnick, T., Deprez, C., Toutirais, G., Loussert, C., Marande, W., Grellier,**  
786 **P., Bastin, P. and Kohl, L.** (2009). Kinesin 9 family members perform separate functions in  
787 the trypanosome flagellum. *J Cell Biol* **187**, 615–622.
- 788 **Dilbeck, V., Berberof, M., Van Cauwenberge, A., Alexandre, H. and Pays, E.** (1999).  
789 Characterization of a coiled coil protein present in the basal body of *Trypanosoma brucei*. *J*  
790 *Cell Sci* **112 ( Pt 24)**, 4687–4694.
- 791 **Dishinger, J. F., Kee, H. L., Jenkins, P. M., Fan, S., Hurd, T. W., Hammond, J. W., Truong,**  
792 **Y. N.-T., Margolis, B., Martens, J. R. and Verhey, K. J.** (2010). Ciliary entry of the  
793 kinesin-2 motor KIF17 is regulated by importin-beta2 and RanGTP. *Nat Cell Biol* **12**, 703–  
794 710.
- 795 **Doodhi, H., Ghosal, D., Krishnamurthy, M., Jana, S. C., Shamala, D., Bhaduri, A.,**  
796 **Sowdhamini, R. and Ray, K.** (2009). KAP, the accessory subunit of kinesin-2, binds the  
797 predicted coiled-coil stalk of the motor subunits. *Biochemistry* **48**, 2248–2260.
- 798 **Durand-Dubief, M. and Bastin, P.** (2003). TbAGO1, an argonaute protein required for RNA  
799 interference, is involved in mitosis and chromosome segregation in *Trypanosoma brucei*.  
800 *BMC Biol.* **1**, 2.
- 801 **Edelstein, A., Amodaj, N., Hoover, K., Vale, R. and Stuurman, N.** (2010). Computer control  
802 of microscopes using  $\mu$ Manager. *Curr Protoc Mol Biol* **Chapter 14**, Unit14.20.
- 803 **Engstler, M., Pfohl, T., Herminghaus, S., Boshart, M., Wiegertjes, G., Heddergott, N. and**  
804 **Overath, P.** (2007). Hydrodynamic flow-mediated protein sorting on the cell surface of  
805 trypanosomes. *Cell* **131**, 505–515.

- 806 **Fan, J. and Beck, K. A.** (2004). A role for the spectrin superfamily member Syne-1 and kinesin  
807 II in cytokinesis. *J Cell Sci* **117**, 619–629.
- 808 **Farr, H. and Gull, K.** (2009). Functional studies of an evolutionarily conserved, cytochrome b5  
809 domain protein reveal a specific role in axonemal organisation and the general phenomenon  
810 of post-division axonemal growth in trypanosomes. *Cell Motil Cytoskeleton* **66**, 24–35.
- 811 **Farr, H. and Gull, K.** (2012). Cytokinesis in trypanosomes. *Cytoskeleton (Hoboken)* **69**, 931–  
812 941.
- 813 **Fort, C., Bonnefoy, S., Kohl, L. and Bastin, P.** (2016). Intraflagellar transport is required for  
814 the maintenance of the trypanosome flagellum composition but not its length. *J Cell Sci* **129**,  
815 3026–3041.
- 816 **Franklin, J. B. and Ullu, E.** (2010). Biochemical analysis of PIFTC3, the *Trypanosoma brucei*  
817 orthologue of nematode DYF-13, reveals interactions with established and putative  
818 intraflagellar transport components. *Mol Microbiol* **78**, 173–186.
- 819 **Gadelha, C., Rothery, S., Morphew, M., McIntosh, J. R., Severs, N. J. and Gull, K.** (2009).  
820 Membrane domains and flagellar pocket boundaries are influenced by the cytoskeleton in  
821 African trypanosomes. *Proc Natl Acad Sci USA* **106**, 17425–17430.
- 822 **Gheiratmand, L., Brasseur, A., Zhou, Q. and He, C. Y.** (2013). Biochemical characterization  
823 of the bi-lobe reveals a continuous structural network linking the bi-lobe to other single-  
824 copied organelles in *Trypanosoma brucei*. *J Biol Chem* **288**, 3489–3499.
- 825 **Gluezn, E., Povelones, M. L., Englund, P. T. and Gull, K.** (2011). The kinetoplast duplication  
826 cycle in *Trypanosoma brucei* is orchestrated by cytoskeleton-mediated cell morphogenesis.  
827 *Mol Cell Biol* **31**, 1012–1021.
- 828 **Goetz, S. C. and Anderson, K. V.** (2010). The primary cilium: a signalling centre during  
829 vertebrate development. *Nat. Rev. Genet.* **11**, 331–344.
- 830 **Goodson, H. V., Kang, S. J. and Endow, S. A.** (1994). Molecular phylogeny of the kinesin  
831 family of microtubule motor proteins. *J Cell Sci* **107 ( Pt 7)**, 1875–1884.
- 832 **Granger, E., McNee, G., Allan, V. and Woodman, P.** (2014). The role of the cytoskeleton and  
833 molecular motors in endosomal dynamics. *Semin. Cell Dev. Biol.* **31**, 20–29.
- 834 **Gull, K.** (1999). The cytoskeleton of trypanosomatid parasites. *Annu Rev Microbiol* **53**, 629–  
835 655.
- 836 **Hammarton, T. C., Kramer, S., Tetley, L., Boshart, M. and Mottram, J. C.** (2007a).  
837 *Trypanosoma brucei* Polo-like kinase is essential for basal body duplication, kDNA  
838 segregation and cytokinesis. *Mol Microbiol* **65**, 1229–1248.
- 839 **Hammarton, T. C., Monnerat, S. and Mottram, J. C.** (2007b). Cytokinesis in  
840 trypanosomatids. *Curr Opin Microbiol* **10**, 520–527.

- 841 **Haraguchi, K., Hayashi, T., Jimbo, T., Yamamoto, T. and Akiyama, T.** (2006). Role of the  
842 kinesin-2 family protein, KIF3, during mitosis. *J Biol Chem* **281**, 4094–4099.
- 843 **Heddergott, N., Krüger, T., Babu, S. B., Wei, A., Stellamanns, E., Uppaluri, S., Pfohl, T.,**  
844 **Stark, H. and Engstler, M.** (2012). Trypanosome motion represents an adaptation to the  
845 crowded environment of the vertebrate bloodstream. *PLoS Pathog* **8**, e1003023.
- 846 **Hesse, F., Selzer, P. M., Mühlstädt, K. and Duszenko, M.** (1995). A novel cultivation  
847 technique for long-term maintenance of bloodstream form trypanosomes in vitro. *Mol*  
848 *Biochem Parasitol* **70**, 157–166.
- 849 **Hirokawa, N., Niwa, S. and Tanaka, Y.** (2010). Molecular motors in neurons: transport  
850 mechanisms and roles in brain function, development, and disease. *Neuron* **68**, 610–638.
- 851 **Huet, D., Blisnick, T., Perrot, S. and Bastin, P.** (2014). The GTPase IFT27 is involved in both  
852 anterograde and retrograde intraflagellar transport. *Elife* **3**, e02419.
- 853 **Ikeda, K. N. and de Graffenried, C. L.** (2012). Polo-like kinase is necessary for flagellum  
854 inheritance in *Trypanosoma brucei*. *J Cell Sci* **125**, 3173–3184.
- 855 **Imanishi, M., Endres, N. F., Gennerich, A. and Vale, R. D.** (2006). Autoinhibition regulates  
856 the motility of the *C. elegans* intraflagellar transport motor OSM-3. *J. Cell Biol.* **174**, 931–  
857 937.
- 858 **Insinna, C. and Besharse, J. C.** (2008). Intraflagellar transport and the sensory outer segment of  
859 vertebrate photoreceptors. *Dev. Dyn.* **237**, 1982–1992.
- 860 **Ishikawa, H. and Marshall, W. F.** (2011). Ciliogenesis: building the cell's antenna. *Cold Spring*  
861 *Harb Perspect Biol* **12**, 222–234.
- 862 **Julkowska, D. and Bastin, P.** (2009). Tools for analyzing intraflagellar transport in  
863 trypanosomes. *Methods Cell Biol.* **93**, 59–80.
- 864 **Kee, H. L., Dishinger, J. F., Blasius, T. L., Liu, C.-J., Margolis, B. and Verhey, K. J.** (2012).  
865 A size-exclusion permeability barrier and nucleoporins characterize a ciliary pore complex  
866 that regulates transport into cilia. *Nat Cell Biol* **14**, 431–437.
- 867 **Kennedy, P. G.** (2013). Clinical features, diagnosis, and treatment of human African  
868 trypanosomiasis (sleeping sickness). *Lancet Neurol* **12**, 186–194.
- 869 **Kisalu, N. K., Langousis, G., Bentolila, L. A., Ralston, K. S. and Hill, K. L.** (2014). Mouse  
870 infection and pathogenesis by *Trypanosoma brucei* motility mutants. *Cell Microbiol* **16**,  
871 912–924.
- 872 **Kohl, L. and Bastin, P.** (2005). The flagellum of trypanosomes. *Int Rev Cytol* **244**, 227–285.
- 873 **Kohl, L., Robinson, D. and Bastin, P.** (2003). Novel roles for the flagellum in cell  
874 morphogenesis and cytokinesis of trypanosomes. *EMBO J* **22**, 5336–5346.

- 875 **Kohl, L., Sherwin, T. and Gull, K.** (1999). Assembly of the paraflagellar rod and the flagellum  
876 attachment zone complex during the *Trypanosoma brucei* cell cycle. *J Eukaryot Microbiol*  
877 **46**, 105–109.
- 878 **Kozminski, K. G., Beech, P. L. and Rosenbaum, J. L.** (1995). The *Chlamydomonas* kinesin-  
879 like protein FLA10 is involved in motility associated with the flagellar membrane. *J Cell*  
880 *Biol* **131**, 1517–1527.
- 881 **Kozminski, K. G., Johnson, K. A., Forscher, P. and Rosenbaum, J. L.** (1993). A motility in  
882 the eukaryotic flagellum unrelated to flagellar beating. *Proc Natl Acad Sci USA* **90**, 5519–  
883 5523.
- 884 **Kumar, P. and Wang, C. C.** (2006). Dissociation of cytokinesis initiation from mitotic control  
885 in a eukaryote. *Eukaryotic Cell* **5**, 92–102.
- 886 **Lacomble, S., Vaughan, S., Gadelha, C., Morpew, M. K., Shaw, M. K., McIntosh, J. R.**  
887 **and Gull, K.** (2009). Three-dimensional cellular architecture of the flagellar pocket and  
888 associated cytoskeleton in trypanosomes revealed by electron microscope tomography. *J*  
889 *Cell Sci* **122**, 1081–1090.
- 890 **Lacomble, S., Vaughan, S., Gadelha, C., Morpew, M. K., Shaw, M. K., McIntosh, J. R.**  
891 **and Gull, K.** (2010). Basal body movements orchestrate membrane organelle division and  
892 cell morphogenesis in *Trypanosoma brucei*. *J Cell Sci* **123**, 2884–2891.
- 893 **LaCount, D. J., Barrett, B. and Donelson, J. E.** (2002). *Trypanosoma brucei* FLA1 is required  
894 for flagellum attachment and cytokinesis. *J. Biol. Chem.* **277**, 17580–17588.
- 895 **Langousis, G. and Hill, K. L.** (2014). Motility and more: the flagellum of *Trypanosoma brucei*.  
896 *Nat Rev Microbiol* **12**, 505–518.
- 897 **Lechtreck, K. F.** (2015). IFT-Cargo Interactions and Protein Transport in Cilia. *Trends Biochem*  
898 *Sci* **40**, 765–778.
- 899 **Li, Z. and Wang, C. C.** (2006). Changing roles of aurora-B kinase in two life cycle stages of  
900 *Trypanosoma brucei*. *Eukaryotic Cell* **5**, 1026–1035.
- 901 **Li, Z., Umeyama, T., Li, Z. and Wang, C. C.** (2010). Polo-like kinase guides cytokinesis in  
902 *Trypanosoma brucei* through an indirect means. *Eukaryotic Cell* **9**, 705–716.
- 903 **Manders, E. M. M., Verbeek, F. J. and Aten, J. A.** (1993). Measurement of co-localization of  
904 objects in dual-colour confocal images. *J Microsc* **169**, 375–382.
- 905 **Marande, W. and Kohl, L.** (2011). Flagellar kinesins in protists. *Future Microbiol* **6**, 231–246.
- 906 **Miller, M. S., Esparza, J. M., Lipka, A. M., Lux, F. G., Cole, D. G. and Dutcher, S. K.**  
907 (2005). Mutant kinesin-2 motor subunits increase chromosome loss. *Mol Biol Cell* **16**, 3810–  
908 3820.

- 909 **Morris, J. C., Wang, Z., Drew, M. E., Paul, K. S. and Englund, P. T.** (2001). Inhibition of  
910 bloodstream form *Trypanosoma brucei* gene expression by RNA interference using the  
911 pZJM dual T7 vector. *Mol Biochem Parasitol* **117**, 111–113.
- 912 **Mueller, J., Perrone, C. A., Bower, R., Cole, D. G. and Porter, M. E.** (2005). The FLA3 KAP  
913 subunit is required for localization of kinesin-2 to the site of flagellar assembly and  
914 processive anterograde intraflagellar transport. *Mol Biol Cell* **16**, 1341–1354.
- 915 **Ogbadoyi, E. O., Robinson, D. R. and Gull, K.** (2003). A high-order trans-membrane  
916 structural linkage is responsible for mitochondrial genome positioning and segregation by  
917 flagellar basal bodies in trypanosomes. *Mol Biol Cell* **14**, 1769–1779.
- 918 **Pigino, G., Geimer, S., Lanzavecchia, S., Paccagnini, E., Cantele, F., Diener, D. R.,  
919 Rosenbaum, J. L. and Lupetti, P.** (2009). Electron-tomographic analysis of intraflagellar  
920 transport particle trains in situ. *J Cell Biol* **187**, 135–148.
- 921 **Piperno, G. and Mead, K.** (1997). Transport of a novel complex in the cytoplasmic matrix of  
922 *Chlamydomonas* flagella. *Proc Natl Acad Sci U S A* **94**, 4457–4462.
- 923 **Piperno, G., Mead, K. and Henderson, S.** (1996). Inner dynein arms but not outer dynein arms  
924 require the activity of kinesin homologue protein KHP1(FLA10) to reach the distal part of  
925 flagella in *Chlamydomonas*. *J. Cell Biol.* **133**, 371–379.
- 926 **Prevo, B., Mangeol, P., Oswald, F., Scholey, J. M. and Peterman, E. J. G.** (2015). Functional  
927 differentiation of cooperating kinesin-2 motors orchestrates cargo import and transport in *C.*  
928 *elegans* cilia. *Nat Cell Biol* **17**, 1536–1545.
- 929 **Prevo, B., Scholey, J. M. and Peterman, E. J. G.** (2017). Intraflagellar transport: mechanisms  
930 of motor action, cooperation, and cargo delivery. *Febs J* **2**, 779.
- 931 **Ralston, K. S. and Hill, K. L.** (2006). Trypanin, a component of the flagellar Dynein regulatory  
932 complex, is essential in bloodstream form African trypanosomes. *PLoS Pathog* **2**, e101.
- 933 **Ralston, K. S., Kabututu, Z. P., Melehani, J. H., Oberholzer, M. and Hill, K. L.** (2009). The  
934 *Trypanosoma brucei* flagellum: moving parasites in new directions. *Annu Rev Microbiol* **63**,  
935 335–362.
- 936 **Ralston, K. S., Kisalu, N. K. and Hill, K. L.** (2011). Structure-function analysis of dynein light  
937 chain 1 identifies viable motility mutants in bloodstream-form *Trypanosoma brucei*.  
938 *Eukaryotic Cell* **10**, 884–894.
- 939 **Ralston, K. S., Lerner, A. G., Diener, D. R. and Hill, K. L.** (2006). Flagellar motility  
940 contributes to cytokinesis in *Trypanosoma brucei* and is modulated by an evolutionarily  
941 conserved dynein regulatory system. *Eukaryotic Cell* **5**, 696–711.
- 942 **Redmond, S., Vadivelu, J. and Field, M. C.** (2003). RNAi: an automated web-based tool for  
943 the selection of RNAi targets in *Trypanosoma brucei*. *Mol Biochem Parasitol* **128**, 115–118.



- 944 **Robays, J., Nyamowala, G., Sese, C., Betu Ku Mesu Kande, V., Lutumba, P., Van der**  
945 **Veken, W. and Boelaert, M.** (2008). High failure rates of melarsoprol for sleeping sickness,  
946 Democratic Republic of Congo. *Emerging Infect Dis* **14**, 966–967.
- 947 **Robinson, D. R. and Gull, K.** (1991). Basal body movements as a mechanism for mitochondrial  
948 genome segregation in the trypanosome cell cycle. *Nature* **352**, 731–733.
- 949 **Robinson, D. R., Sherwin, T., Ploubidou, A., Byard, E. H. and Gull, K.** (1995). Microtubule  
950 polarity and dynamics in the control of organelle positioning, segregation, and cytokinesis in  
951 the trypanosome cell cycle. *J. Cell Biol.* **128**, 1163–1172.
- 952 **Robinson, D., Beattie, P., Sherwin, T. and Gull, K.** (1991). Microtubules, tubulin, and  
953 microtubule-associated proteins of trypanosomes. *Meth Enzymol* **196**, 285–299.
- 954 **Rodríguez, J. A., Lopez, M. A., Thayer, M. C., Zhao, Y., Oberholzer, M., Chang, D. D.,**  
955 **Kisalu, N. K., Penichet, M. L., Helguera, G., Bruinsma, R., et al.** (2009). Propulsion of  
956 African trypanosomes is driven by bihelical waves with alternating chirality separated by  
957 kinks. *Proc Natl Acad Sci USA* **106**, 19322–19327.
- 958 **Sagolla, M. S., Dawson, S. C., Mancuso, J. J. and Cande, W. Z.** (2006). Three-dimensional  
959 analysis of mitosis and cytokinesis in the binucleate parasite *Giardia intestinalis*. *J Cell Sci*  
960 **119**, 4889–4900.
- 961 **Schmittgen, T. D. and Livak, K. J.** (2008). Analyzing real-time PCR data by the comparative  
962 C(T) method. *Nat Protoc* **3**, 1101–1108.
- 963 **Schneider, C. A., Rasband, W. S. and Eliceiri, K. W.** (2012). NIH Image to ImageJ: 25 years  
964 of image analysis. *Nat Methods* **9**, 671–675.
- 965 **Scholey, J. M.** (2013). Kinesin-2: a family of heterotrimeric and homodimeric motors with  
966 diverse intracellular transport functions. *Annu Rev Cell Dev Biol* **29**, 443–469.
- 967 **Selvapandiyan, A., Kumar, P., Morris, J. C., Salisbury, J. L., Wang, C. C. and Nakhasi, H.**  
968 **L.** (2007). Centrin1 is required for organelle segregation and cytokinesis in *Trypanosoma*  
969 *brucei*. *Mol Biol Cell* **18**, 3290–3301.
- 970 **Sherwin, T. and Gull, K.** (1989). The cell division cycle of *Trypanosoma brucei brucei*: timing  
971 of event markers and cytoskeletal modulations. *Philos Trans R Soc Lond, B, Biol Sci* **323**,  
972 573–588.
- 973 **Shi, J., Franklin, J. B., Yelinek, J. T., Ebersberger, I., Warren, G. and He, C. Y.** (2008).  
974 Centrin4 coordinates cell and nuclear division in *T. brucei*. *J Cell Sci* **121**, 3062–3070.
- 975 **Signor, D., Wedaman, K. P., Rose, L. S. and Scholey, J. M.** (1999). Two heteromeric kinesin  
976 complexes in chemosensory neurons and sensory cilia of *Caenorhabditis elegans*. *Mol Biol*  
977 *Cell* **10**, 345–360.
- 978 **Snow, J. J., Ou, G., Gunnarson, A. L., Walker, M. R. S., Zhou, H. M., Brust-Mascher, I.**

- 979 **and Scholey, J. M.** (2004). Two anterograde intraflagellar transport motors cooperate to  
980 build sensory cilia on *C. elegans* neurons. *Nat Cell Biol* **6**, 1109–1113.
- 981 **Stauber, T., Simpson, J. C., Pepperkok, R. and Vernos, I.** (2006). A role for kinesin-2 in  
982 COPI-dependent recycling between the ER and the Golgi complex. *Curr Biol* **16**, 2245–  
983 2251.
- 984 **Sun, L. and Wang, C. C.** (2011). The structural basis of localizing polo-like kinase to the  
985 flagellum attachment zone in *Trypanosoma brucei*. *PLoS ONE* **6**, e27303.
- 986 **Sunter, J. D. and Gull, K.** (2016). The Flagellum Attachment Zone: “The Cellular Ruler” of  
987 Trypanosome Morphology. *Trends Parasitol.* **32**, 309–324.
- 988 **Sunter, J. D., Varga, V., Dean, S. and Gull, K.** (2015). A dynamic coordination of flagellum  
989 and cytoplasmic cytoskeleton assembly specifies cell morphogenesis in trypanosomes. *J Cell*  
990 *Sci* **128**, 1580–1594.
- 991 **Tan, K. S. W., Leal, S. T. G. and Cross, G. A. M.** (2002). *Trypanosoma brucei* MRE11 is non-  
992 essential but influences growth, homologous recombination and DNA double-strand break  
993 repair. *Mol Biochem Parasitol* **125**, 11–21.
- 994 **Taschner, M. and Lorentzen, E.** (2016). The Intraflagellar Transport Machinery. *Cold Spring*  
995 *Harb Perspect Biol* **8**, a028092.
- 996 **Taylor, A. E. and Godfrey, D. G.** (1969). A new organelle of bloodstream salivarian  
997 trypanosomes. *J Protozool* **16**, 466–470.
- 998 **Tu, X. and Wang, C. C.** (2004). The involvement of two cdc2-related kinases (CRKs) in  
999 *Trypanosoma brucei* cell cycle regulation and the distinctive stage-specific phenotypes  
1000 caused by CRK3 depletion. *J Biol Chem* **279**, 20519–20528.
- 1001 **Tu, X., Mancuso, J., Cande, W. Z. and Wang, C. C.** (2005). Distinct cytoskeletal modulation  
1002 and regulation of G1-S transition in the two life stages of *Trypanosoma brucei*. *J Cell Sci*  
1003 **118**, 4353–4364.
- 1004 **Umeyama, T. and Wang, C. C.** (2008). Polo-like kinase is expressed in S/G2/M phase and  
1005 associated with the flagellum attachment zone in both procyclic and bloodstream forms of  
1006 *Trypanosoma brucei*. *Eukaryotic Cell* **7**, 1582–1590.
- 1007 **Untergasser, A., Cutcutache, I., Koressaar, T., Ye, J., Faircloth, B. C., Remm, M. and**  
1008 **Rozen, S. G.** (2012). Primer3--new capabilities and interfaces. *Nucleic Acids Res.* **40**, e115–  
1009 e115.
- 1010 **Vale, R. D. and Fletterick, R. J.** (1997). The design plan of kinesin motors. *Annu Rev Cell Dev*  
1011 *Biol* **13**, 745–777.
- 1012 **van Dam, T. J. P., Townsend, M. J., Turk, M., Schlessinger, A., Sali, A., Field, M. C. and**  
1013 **Huynen, M. A.** (2013). Evolution of modular intraflagellar transport from a coatomer-like



- 1014 progenitor. *Proc. Natl. Acad. Sci. U.S.A.* **110**, 6943–6948.
- 1015 **Vashishtha, M., Walther, Z. and Hall, J. L.** (1996). The kinesin-homologous protein encoded  
1016 by the Chlamydomonas FLA10 gene is associated with basal bodies and centrioles. *J Cell*  
1017 *Sci* **109 ( Pt 3)**, 541–549.
- 1018 **Verhey, K. J., Dishinger, J. and Kee, H. L.** (2011). Kinesin motors and primary cilia. *Biochem.*  
1019 *Soc. Trans.* **39**, 1120–1125.
- 1020 **Vickerman, K. and Preston, T. M.** (1970). Spindle microtubules in the dividing nuclei of  
1021 trypanosomes. *J Cell Sci* **6**, 365–383.
- 1022 **Vukajlovic, M., Dietz, H., Schliwa, M. and Ökten, Z.** (2011). How kinesin-2 forms a stalk.  
1023 *Mol Biol Cell* **22**, 4279–4287.
- 1024 **Wang, M., Gheiratmand, L. and He, C. Y.** (2012). An interplay between Centrin2 and  
1025 Centrin4 on the bi-lobed structure in *Trypanosoma brucei*. *Mol Microbiol* **83**, 1153–1161.
- 1026 **Wang, Z., Morris, J. C., Drew, M. E. and Englund, P. T.** (2000). Inhibition of *Trypanosoma*  
1027 *brucei* gene expression by RNA interference using an integratable vector with opposing T7  
1028 promoters. *J Biol Chem* **275**, 40174–40179.
- 1029 **Wedaman, K. P., Meyer, D. W., Rashid, D. J., Cole, D. G. and Scholey, J. M.** (1996).  
1030 Sequence and submolecular localization of the 115-kD accessory subunit of the  
1031 heterotrimeric kinesin-II (KRP85/95) complex. *J. Cell Biol.* **132**, 371–380.
- 1032 **Wickstead, B. and Gull, K.** (2006). A “holistic” kinesin phylogeny reveals new kinesin families  
1033 and predicts protein functions. *Mol Biol Cell* **17**, 1734–1743.
- 1034 **Wickstead, B., Carrington, J. T., Gluenz, E. and Gull, K.** (2010a). The expanded Kinesin-13  
1035 repertoire of trypanosomes contains only one mitotic Kinesin indicating multiple extra-  
1036 nuclear roles. *PLoS ONE* **5**, e15020.
- 1037 **Wickstead, B., Gull, K. and Richards, T. A.** (2010b). Patterns of kinesin evolution reveal a  
1038 complex ancestral eukaryote with a multifunctional cytoskeleton. *BMC Evol. Biol.* **10**, 110.
- 1039 **Wilkinson, S. R., Taylor, M. C., Horn, D., Kelly, J. M. and Cheeseman, I.** (2008). A  
1040 mechanism for cross-resistance to nifurtimox and benznidazole in trypanosomes. *Proc Natl*  
1041 *Acad Sci USA* **105**, 5022–5027.
- 1042 **Wirtz, E., Leal, S., Ochatt, C. and Cross, G. A.** (1999). A tightly regulated inducible  
1043 expression system for conditional gene knock-outs and dominant-negative genetics in  
1044 *Trypanosoma brucei*. *Mol Biochem Parasitol* **99**, 89–101.
- 1045 **Woods, A., Sherwin, T., Sasse, R., MacRae, T. H., Baines, A. J. and Gull, K.** (1989).  
1046 Definition of individual components within the cytoskeleton of *Trypanosoma brucei* by a  
1047 library of monoclonal antibodies. *J Cell Sci* **93 ( Pt 3)**, 491–500.

- 1048 **Yu, Z., Liu, Y. and Li, Z.** (2012). Structure-function relationship of the Polo-like kinase in  
1049 *Trypanosoma brucei*. *J Cell Sci* **125**, 1519–1530.
- 1050 **Zhou, Q., Hu, H. and Li, Z.** (2014). New insights into the molecular mechanisms of mitosis and  
1051 cytokinesis in trypanosomes. *Int Rev Cell Mol Biol* **308**, 127–166.
- 1052 **Zhou, Q., Hu, H., He, C. Y. and Li, Z.** (2015). Assembly and maintenance of the flagellum  
1053 attachment zone filament in *Trypanosoma brucei*. *J Cell Sci* **128**, 2361–2372.
- 1054

## 1055 **Figure Legends**

1056

1057 **Fig. 1: Multiple EM for motif elicitation (MEME) analysis of kinesin 2 sequences from**

1058 **diverse species. (A)** Schematic illustration of TbKin2a and TbKin2b protein domains. **(B)**

1059 Heatmap matrix showing results from a single, representative MEME motif run (MEME 83; out

1060 of over 80 runs; see Supplemental File 1 for a list of NST FASTA sequences; see Supplementary

1061 File 2 for detailed MEME 83 results). Rows represent 68 taxa (legend (i): species abbreviations

1062 require magnification and are explained in Table S3B). Columns represent 26 statistically

1063 significant motifs that are clustered into motif groups (based on total E-values; see Fig. S1B for

1064 additional information; motif 29 was not statistically significant but is included anyway). Each

1065 taxon and motif is color-coded based on motif p-values (legend (ii): from heat map value (hmv)

1066 of 3 (magenta) to 0 (blue), indicating taxon-specific individual motif p-values as: 3 = p-value  $\leq 1$

1067  $\times 10^{-10}$ , 2 = p-value  $> 1 \times 10^{-10}$  and  $\leq 1 \times 10^{-08}$ , 1 = p-value  $> 1 \times 10^{-08}$  and  $\leq 1 \times 10^{-05}$ , and 0 = p-

1068 value  $> 1 \times 10^{-05}$ ). Motif groups are also color-coded (legend (iii): neck (nk or n), motif 1; 1°

1069 kinesin-2 (Kin2 1° or 1°), motifs 2, 3, 4, 10; 2° kinesin-2 (Kin2 2° or 2°), motifs 6, 7, 8, 12;

1070 KRP85-specific motifs (Kin2A or 2A), motifs 11, 13; KRP95-specific motifs (Kin2B or 2B),

1071 motifs 5, 9, 20, 21; present in both KRP85/Kin2A and KRP95/Kin2B (K2AB or AB), motifs 23,

1072 24; Osm3-specific homodimeric (Kin2C or 2C), motifs 17, 22, 29; kinesoplastid-specific (knto

1073 or k), motifs 15, 16, 18; other protist-specific (op or p), motifs 19, 25; undefined (nd), motif 14).

1074 In rare cases, a single taxon had both 2A and 2B motifs (legend (iv)). The far right column

1075 indicates presence/absence of the KAP3 subunit in each taxon (legend (v): with KAP 3 +, red

1076 square; no KAP3 -, blue square). **(C)** NST motif and coiled-coil domain schematics for TbKin2a,

1077 TbKin2b, and other representative kinesin-2 proteins. Individual motifs are numbered, and each

1078 motif sequence is shown in Fig. S1. A key to motif labels and colors is in Fig. S2A. Motif widths  
1079 are scaled to sequence length, and motif heights indicate p-value ranges (see Fig. S2 (B)). Also  
1080 see Fig. S2 (D-F) for a more complete set of schematics of representative kinesin-2 proteins. **(D)**  
1081 NST motif and motif group distribution among a phylogenetically diverse sampling of  
1082 eukaryotes that have kinesin-2 proteins. Rows represent the listed species. Column designations  
1083 are indicated under each column as follows: (#) Indicates the number of kinesin-2 taxa in the  
1084 species (legend (i): number of taxa); (1°, 2°) Indicates the frequency that 1° and 2° motifs occur  
1085 by color coding (legend (ii): dark blue  $\geq 2$  motifs at a hmv = 3, medium blue  $\sim 1$  motif at hmv = 3  
1086 or  $\sim 2$  motifs at hmv = 2, light blue  $\sim 1$  motif at hmv = 2 or  $> 2$  motifs at hmv = 1, unfilled values  
1087  $<$  previous categories); ( $\Delta$ ) Indicates whether the order and location of motifs is typical (blue) or  
1088 atypical (red) (legend (iii): blue star typical, red star atypical). For additional information on  
1089 motif orders, see Fig. S2C. (2A, 2B) Indicates the frequency that 2A and 2B motifs occur by  
1090 color coding (legend (ii): dark blue  $\geq 1$  motif at hmv = 3, medium blue  $\geq \sim 1$  motif at hmv = 2,  
1091 light blue  $\geq \sim 1$  motifs at hmv = 1). (2C) Indicates the presence of a 2C motif assignment (legend  
1092 (iv): motif assignments to kinetoplastids are outlined with green dots); [H] (k3) Indicates the  
1093 presence (blue) or absence (red) of genes encoding KAP3 homologs. (legend (v): blue star Kap3  
1094 present, red star Kap3 absent) (MC) Indicates the number of kinesin-2 NST motif groups  
1095 conserved within that species, out of 6 primary motif groups. (legend (vi): number of motif  
1096 groups). The letters a-i to the right show phylogenetic groups: (a) kinetoplastids, (b)  
1097 heterobolosea, (c) metamonada, (d) algae and plants that produce flagellated cells, (e)  
1098 stramenopiles, (f) alveolata (including apicomplexia), (g) fungi (unusual), (h) holozoa, (i)  
1099 metazoa. **(E)** Schematic based on tree of life presented in (Adl et al., 2012). Species groupings  
1100 (letters (a-i) from panel (D)) are placed to show distribution within eukaryotic superphyla:

1101 ophistokonta (metazoa, holozoa, fungi), amobozoa, SAR (stramenopiles, alveolates and rhizaria),  
1102 archaeplastida, and excavata. The degree of motif conservation is color coded. Orange dotted  
1103 line shows approximate location of possible kinesin-2 divide within the discoba branch of  
1104 excavates.

1105

1106 **Fig. 2: TbKin2a localizes to flagella and basal bodies. (A)** BSF (90-13) cells F/M-fixed and  
1107 stained for TbKin2a (red), paraflagellar rod protein (PFR) as a flagellar marker (green, L8C4)  
1108 and DNA (blue, DAPI). Bar = 5  $\mu$ m. **(B)** TbKin2a mean relative fluorescence intensity measured  
1109 along individual M-fixed flagella mature BSF flagella (measured every 0.1  $\mu$ m from posterior to  
1110 anterior ends, starting adjacent to kinetoplast near proximal end of mature basal body). Mean  
1111 flagellum length = 17  $\mu$ m. Error bars = SD (n = 139). **(C)** Images of a F/M-fixed 1K\*1N cell  
1112 stained for the PFR (green, L8C4), TbKin2a (red), and DNA (blue, DAPI). Bar = 3  $\mu$ m. **(D)**  
1113 Magnified area boxed in (C). Double V indicates unusual posterior end cell staining by TbKin2A  
1114 that was typical only in this stage of cell cycle. Bar = 1  $\mu$ m. **(E)** Images of F/M-fixed 1K\*1N cell  
1115 stained for the PFR (green, L8C4), TbK2a (red) and DNA (blue, DAPI). Bar = 3  $\mu$ m. **(A-E)**  
1116 Standardized abbreviations and symbols include: Fixation method, M-fixed = methanol fixed, F-  
1117 fixed = formaldehyde fixed, F/M-fixed = sequential formaldehyde then methanol fixed; images  
1118 are differential interference contrast (DIC) or fluorescence corresponding to two-dimensional  
1119 (2D) projections from a three-dimensional (3D) deconvolved stack; wide arrow = flagellum  
1120 (interphase) or old flagellum; barbed arrow = new flagellum; k = kinetoplast; k\* = dividing  
1121 kinetoplast; k<sub>a</sub> = anterior kinetoplast; k<sub>p</sub> = posterior kinetoplast; n\* = mitotic nucleus; n =  
1122 nucleus. **(F)** Magnified area boxed in (E). Doubled V indicates narrow area connecting two parts  
1123 of nearly fully divided kinetoplast. Bar = 1.5  $\mu$ m. **(G)** Magnified area boxed in (H) showing: (i-

1124 iii) Region near the basal bodies in wild-type 1K\*1N cell stained for basal bodies (green,  
1125 BBA4), TbKin2a (red) and kinetoplast DNA (blue, DAPI); (iv-vi) Colocalization of three-  
1126 dimensional voxels between BBA4 and TbKin2a (pink), DNA and TbKin2a (purple), and DNA  
1127 and BBA4 (blue). Bar = 0.75  $\mu\text{m}$ . **(H)** Image of a 1K\*1N cell from which panels in (G) are  
1128 taken. Bar = 2.4  $\mu\text{m}$ .

1129

1130 **Fig. 3: Colocalization of TbKin2a with IFTA and IFTB proteins.** **(A)** 1K\*1N cell stained for  
1131 IFT anterograde complex B protein IFT172 (green), TbKin2a (red), and DNA (blue, DAPI).  
1132 Voxels with colocalized IFT172 and TbKin2a are gold. Dotted-ellipse shows area in anterior half  
1133 of flagellum having almost no colocalization. Bar = 2  $\mu\text{m}$ . **(B)** Magnified of boxed area in (A)  
1134 showing the region near basal bodies. Bar = 0.7  $\mu\text{m}$ . See also comment in (D) **(C)** 2K1N\* cell  
1135 stained as in (A). Bar = 4  $\mu\text{m}$ . **(D)** Higher magnification view of boxed area in (C) showing the  
1136 region near basal bodies. Bar = 0.7  $\mu\text{m}$ . Comparison of (B) and (D) staining near basal bodies  
1137 shows typically increased TbKin2a and IFT172 staining at and near base of new flagellum  
1138 (double-V symbol) for 1K\*1N stage cells in (B) relative to 2K1N\* cells in (D). **(E)** 2K1N\* cell  
1139 stained for retrograde complex A protein IFT144 (green), TbKin2a (red) and DNA (blue, DAPI).  
1140 Bar = 2  $\mu\text{m}$ . Note comparative staining for retrograde Complex A protein IFT144 and TbKin2a  
1141 in (E) is generally similar to that between anterograde Complex B protein IFT172 and TbKin2a  
1142 in (C). **(A-E)** All images are of cells that are F/M-fixed and stained as labeled, presented as 2D  
1143 projections from a 3D deconvolved stack. Standardized abbreviations and symbols have the  
1144 same meaning as in Fig. 2. **(F)** Mander's colocalization coefficient and Pearson's covariation  
1145 coefficient for the region surrounding the basal bodies, and the whole cell, to quantify  
1146 colocalization of TbKin2a with IFT172 or IFT144 (for IFT172, n = 11; for IFT144 n = 7).

1147

1148 **Fig. 4: TbKin2a localizes to the FAZ. (A)** 1K1N detergent-extracted cell stained for TbKin2a

1149 (red), FAZ marker protein FAZ1 (green, L3B2) and DNA (blue, DAPI) showing TbKin2a

1150 staining on both flagellum and FAZ. Note that detergent extraction protocol included additions

1151 of ATP and  $Mg^{2+}$ , see Materials and Methods. Bar = 2.5  $\mu$ m. **(B)** 2K1N\* cell, subjected to shear

1152 forces post-fixation such that the new flagellum has become partially detached and separated

1153 from the new FAZ; stained for TbKin2a (red), flagellar PFR (green, L8C4) and DNA (blue,

1154 DAPI). **(C)** Magnified image of boxed area from (B) showing independent TbKin2a staining on

1155 the FAZ as well as on the detached flagellum colocalized with the PFR. **(D)** 1K\*1N cell,

1156 subjected to defined shear forces post-fixation such that both old and new flagella are partially

1157 detached (see Materials and Methods), stained with TbKin2a (red), flagellar PFR (green, L8C4),

1158 and DNA (blue, DAPI). **(E)** 1K\*1N cell subjected to defined shear forces post-fixation such that

1159 the old flagellum is now separated from the old FAZ while the new flagellum and new FAZ are

1160 still unseparated; stained with TbKin2a (red), FAZ1 marker (green, L3B2), and DNA (blue,

1161 DAPI). **(A-E)** All images are of cells that are F/M-fixed and are taken using DIC microscopy, or

1162 fluorescence microscopy corresponding to 2D projections from a 3D deconvolved stack.

1163 Standardized abbreviations and symbols are the same as those in Fig. 2., and new symbols

1164 include the following: bar with filled square = old FAZ; bar with filled circle = new FAZ.

1165

1166 **Fig. 5: Effect of RNAi silencing of TbKin2a and TbKin2b on cell proliferation and division.**

1167 **(A)** Left and right: TbKin2a and TbKin2b mRNA levels in RNAi-uninduced (U) and RNAi-

1168 induced (I) cells at 48 hpi by RT-PCR, with  $\alpha$ -tubulin mRNA levels as a control. Center:

1169 TbKin2a protein levels in wild type (wt), RNAi-induced (I), and uninduced (U) cells at 48 hpi by

1170 Western blotting using anti-TbKin2a (top) or anti-tyrosinated- $\alpha$ -tubulin YL1/2 (control). **(B)**  
1171 Comparison of uninduced versus induced normalized relative TbKin2a and TbKin2b mRNA  
1172 levels in TbKin2a-silenced (n = 4), TbKin2b-silenced (n = 2), and TbKin2a/2b-silenced cells (n  
1173 = 4), as measured by qRT-PCR. Error bars = SD. Relative gene expression and SD was  
1174 determined using the  $2^{-\Delta\Delta C_T}$  method. **(C)** Cell number versus hpi for cells uninduced or induced  
1175 for RNAi to silence TbKin2a, TbKin2b, or TbKin2a/2b. Data is from two independent biological  
1176 experiments, each with three technical replicates. Error bars = SD. **(D)** Cell morphology  
1177 phenotypes with nucleus (N) and kinetoplast (K) counts for TbKin2a RNAi uninduced (n = 197  
1178 cells) and induced (n = 230 cells) 0-72 hpi. 1†N, single abnormally large nucleus. **(E)** FACS  
1179 plots of DNA content for TbKin2a RNAi cells at 0-72 hpi. Error bars = SD. **(F)** Uninduced (top)  
1180 or induced (bottom) M-fixed cells at 72 hpi, stained for the PFR (green, L8C4) or DNA (blue,  
1181 DAPI). Bar = 10  $\mu$ m. **(G)** TbKin2a-silenced cells at 48 hpi stained as in (F). Bar = 5  $\mu$ m. **(H)**  
1182 TbKin2a-silenced cell that was detergent-extracted and stained for the FAZ (red, L3B2) and  
1183 DNA (blue). Bar = 2  $\mu$ m. **(I)** TbKin2a-silenced cell at 72 hpi stained for DNA (blue, DAPI) and  
1184 for nucleoli (green, L1C6). Bar = 2  $\mu$ m. **(J)** TbKin2a/2b-silenced cell at 72 hpi stained for DNA  
1185 (blue, DAPI) and basal bodies (green, BBA4). Bars = 2  $\mu$ m. **(F-J)** All images are of cells that are  
1186 F/M-fixed (except panel F which are M-fixed). Images in (F, J) were taken using DIC  
1187 microscopy, and/or epifluorescence microscopy. (G, H, I) are 2D projections from a 3D  
1188 deconvolved stack. Arrowheads: red = bundled flagella phenotype (failed cytokinesis initiation);  
1189 green = basal body-related abnormalities. Symbols: k† = abnormal kinetoplast (including  
1190 partially separated kinetoplasts); N† = abnormal nucleus (including unseparated nuclei).

1191  
1192 **Fig. 6: Role of TbKin2a and TbKin2b in flagellar length and motility. (A)** Flagellar length in



1193 uninduced cells (TbKin2a, n = 110; TbKin2b, n = 126; TbKin2a2b, n = 104) and RNAi-induced  
1194 cells (TbKin2a, n = 211; TbKin2b, n = 87; TbKin2a2b, n = 127) at 48 hpi. Mean = center line,  
1195 box = SD, whiskers = 95% confidence intervals. 1-way ANOVA with Bonferroni's multiple  
1196 comparison tests, \*\*\* indicates  $p < 0.001$ . **(B)** Table indicating whether IFT172 or IFT144 had  
1197 typical (+) or diminished (-) staining near basal bodies or on flagella in cells induced for RNAi  
1198 of TbKin2a, TbKin2b, or TbKin2a/2b at 48 hpi. **(C)** 2D projection from a 3D deconvolved stack  
1199 showing examples of RNAi-impacted IFT protein staining noted in (B) for (left) TbKin2a2b  
1200 RNAi of IFT172 (compare with uninduced in Fig. 3(D)), and (right) TbKin2a RNAi of IFT144  
1201 (compare with uninduced Fig. 3(E)). Gray arrow between images indicates direction of cell  
1202 anterior/posterior ends. **(D)** Transmission electron micrograph (TEM) of flagellar axonemes for  
1203 wild type (i) and TbKin2a RNAi cells 48-72 hpi (ii-iv). Bars = 100 nm. **(E)** TEM of a TbKin2a  
1204 RNAi cell at 48-72 hpi. **(F)** Magnified view of boxed area from (E). Cyan arrowheads =  
1205 persistent DNA plaques at inner periphery of nuclear envelope. Symbols: n = nucleus, fp =  
1206 flagellar pocket and fl = flagellum. Bars = 500 nm. **(G)** Sedimentation assays initiated at 24 and  
1207 36 hpi in which the difference in  $A_{600nm}$  between matched samples of freshly agitated and settled  
1208 cells is plotted versus settling time. Data is from 2 independent biological experiments with two  
1209 technical replicates per experiment. Error bars = SD. 2-way ANOVA with Bonferroni's post  
1210 tests, \*\*  $p < 0.01$  and \*\*\*  $p < 0.001$ . **(H)** Kinetics of abnormal cell phenotype emergence during  
1211 early time points (16–18 hpi). Epifluorescence images showing early abnormal phenotypes for  
1212 TbKin2a RNAi cells stained for the PFR (green, L8C4) and DNA (blue, DAPI) at 16–18 hpi,  
1213 prior to emergence of abnormal motility in sedimentation assay (G). (i) At 16 hpi and (ii) at 18  
1214 hpi show cells with bundled flagella (failed cytokinesis initiation) phenotype. (iii) at 18 hpi  
1215 shows cells with late cytokinesis (scission) failure. Far posterior ends (cyan arrowheads) of

1216 daughter cells are still connected; however, both cells have progressed to the 2K1N\* stage of the  
1217 next cell cycle. Gray arrow indicates direction of cell anterior and posterior ends. Bar = 5  $\mu$ m.  
1218 **(C-F, H)** Arrowheads: red = bundled flagella phenotype (failed cytokinesis initiation); green =  
1219 basal body abnormalities; orange = abnormal IFT material accumulated; white = normal (no  
1220 abnormalities); dark red = status could not be determined.

# Figure 1, Douglas *et al.*

## A *T. brucei* kinesin-2 protein domains schematic

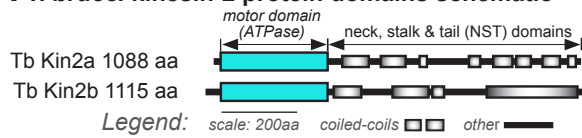

## C NST motifs, motif groups & coiled-coils on select taxa

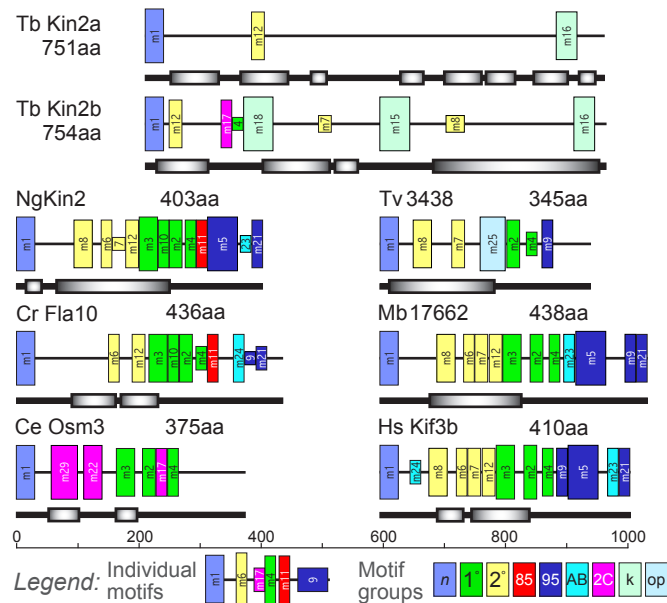

## B Heatmap of MEME-identified kinesin-2 NST motifs

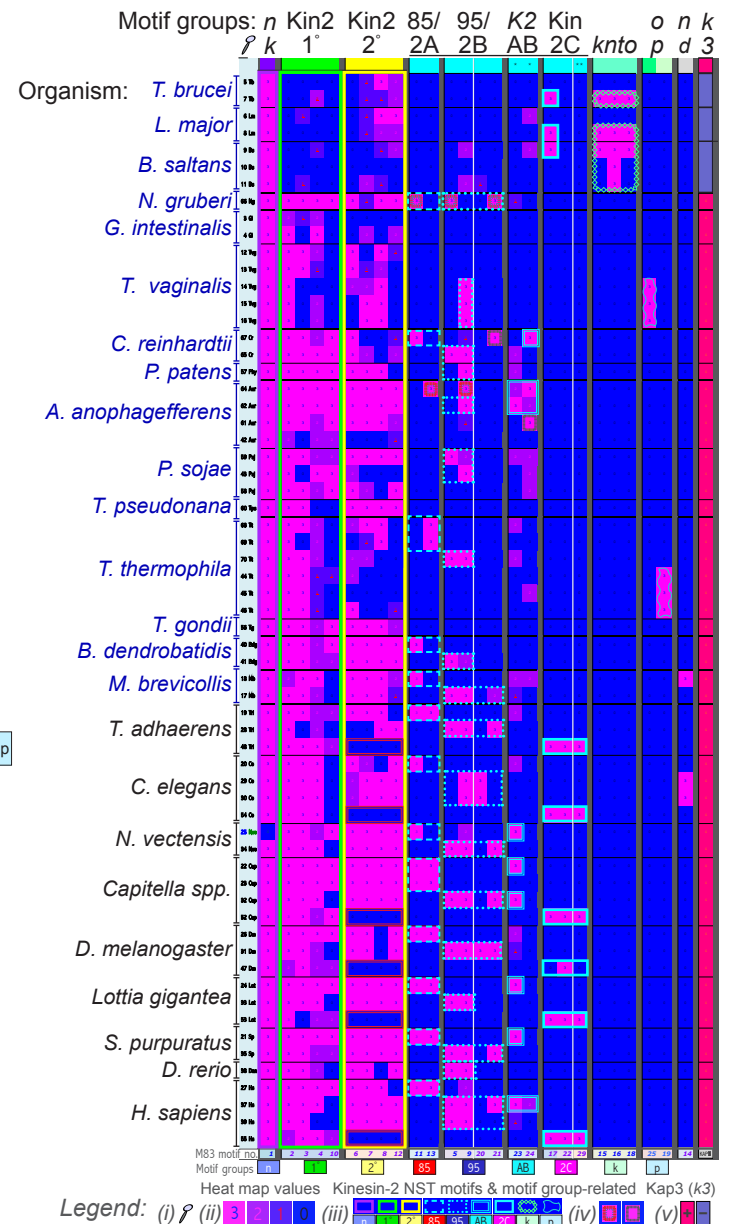

## D NST motifs conservation among diverse organisms

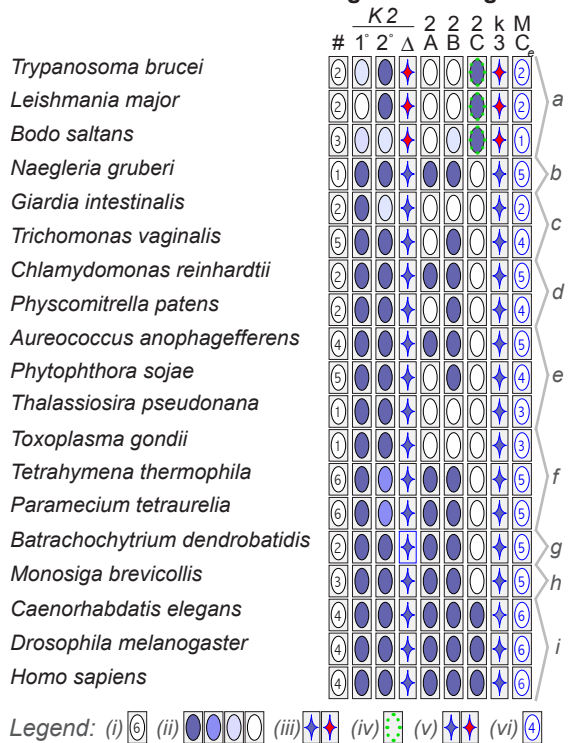

(a - i) Phylogenetic super-groups shown on tree in Fig. 1E.

## E Schematic: NST motif conservation in kinesin-2 containing organisms within eukaryotes in tree of life

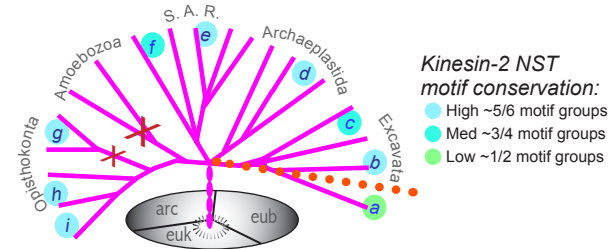

Figure 2, Douglas *et al.*

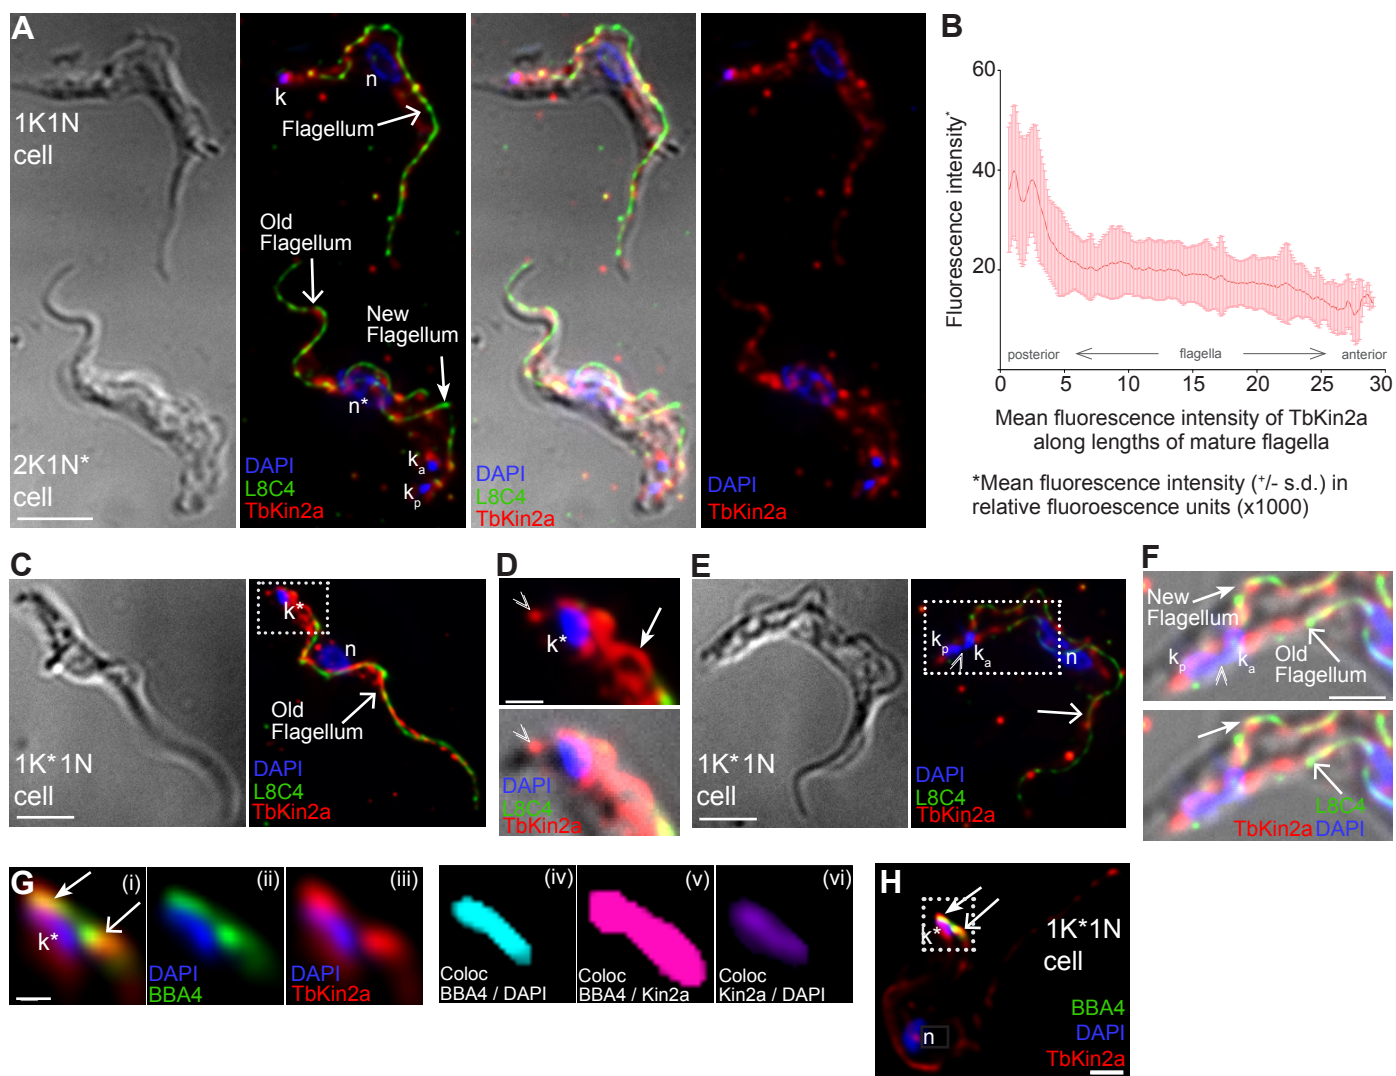

## Figure 3, Douglas *et al.*

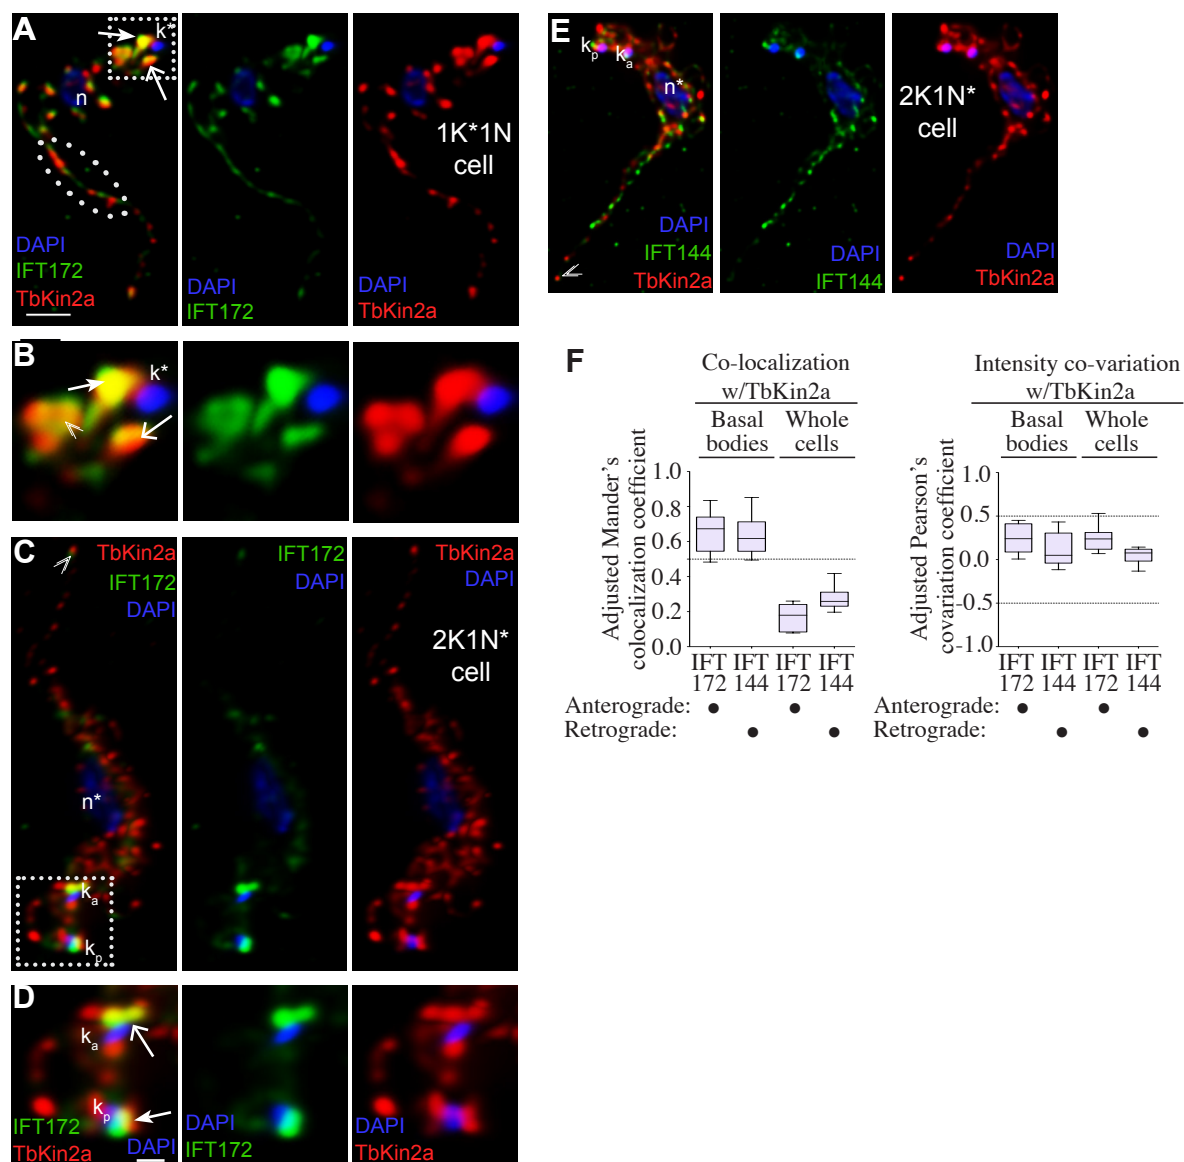



## Figure 4, Douglas *et al.*

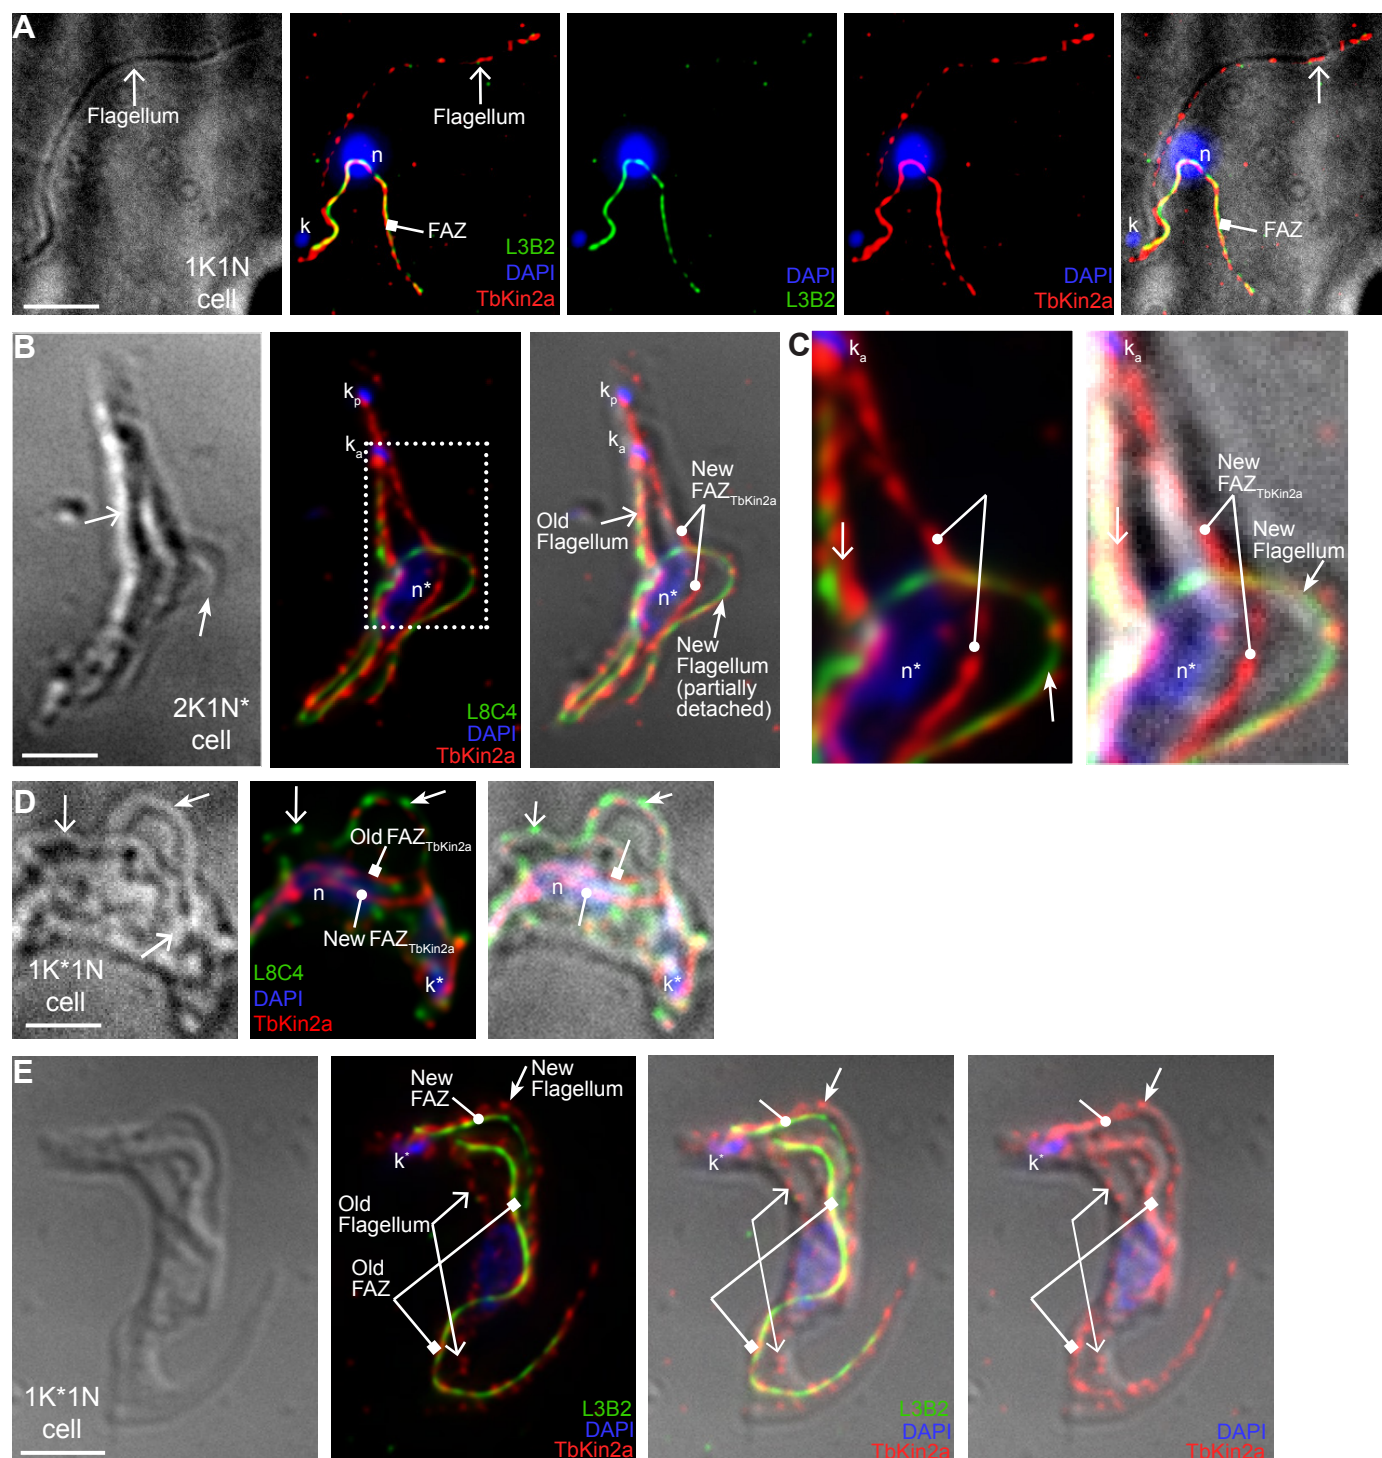

## Figure 5, Douglas *et al.*

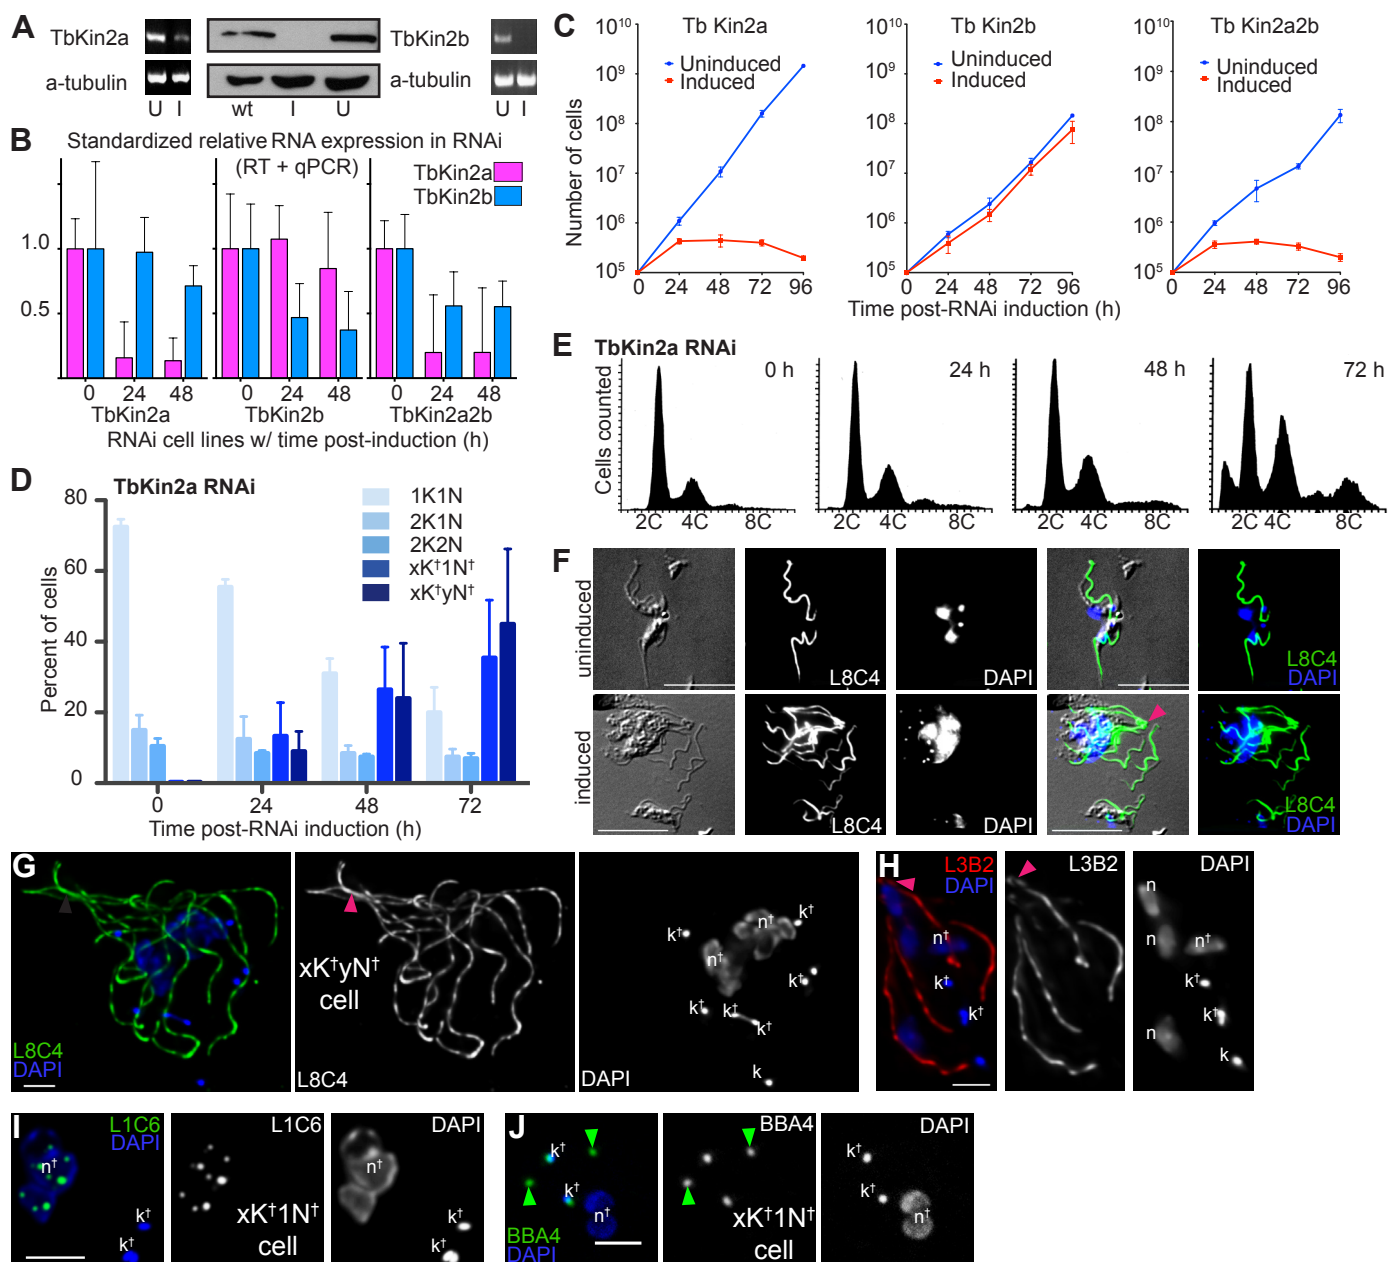

## Figure 6, Douglas *et al.*

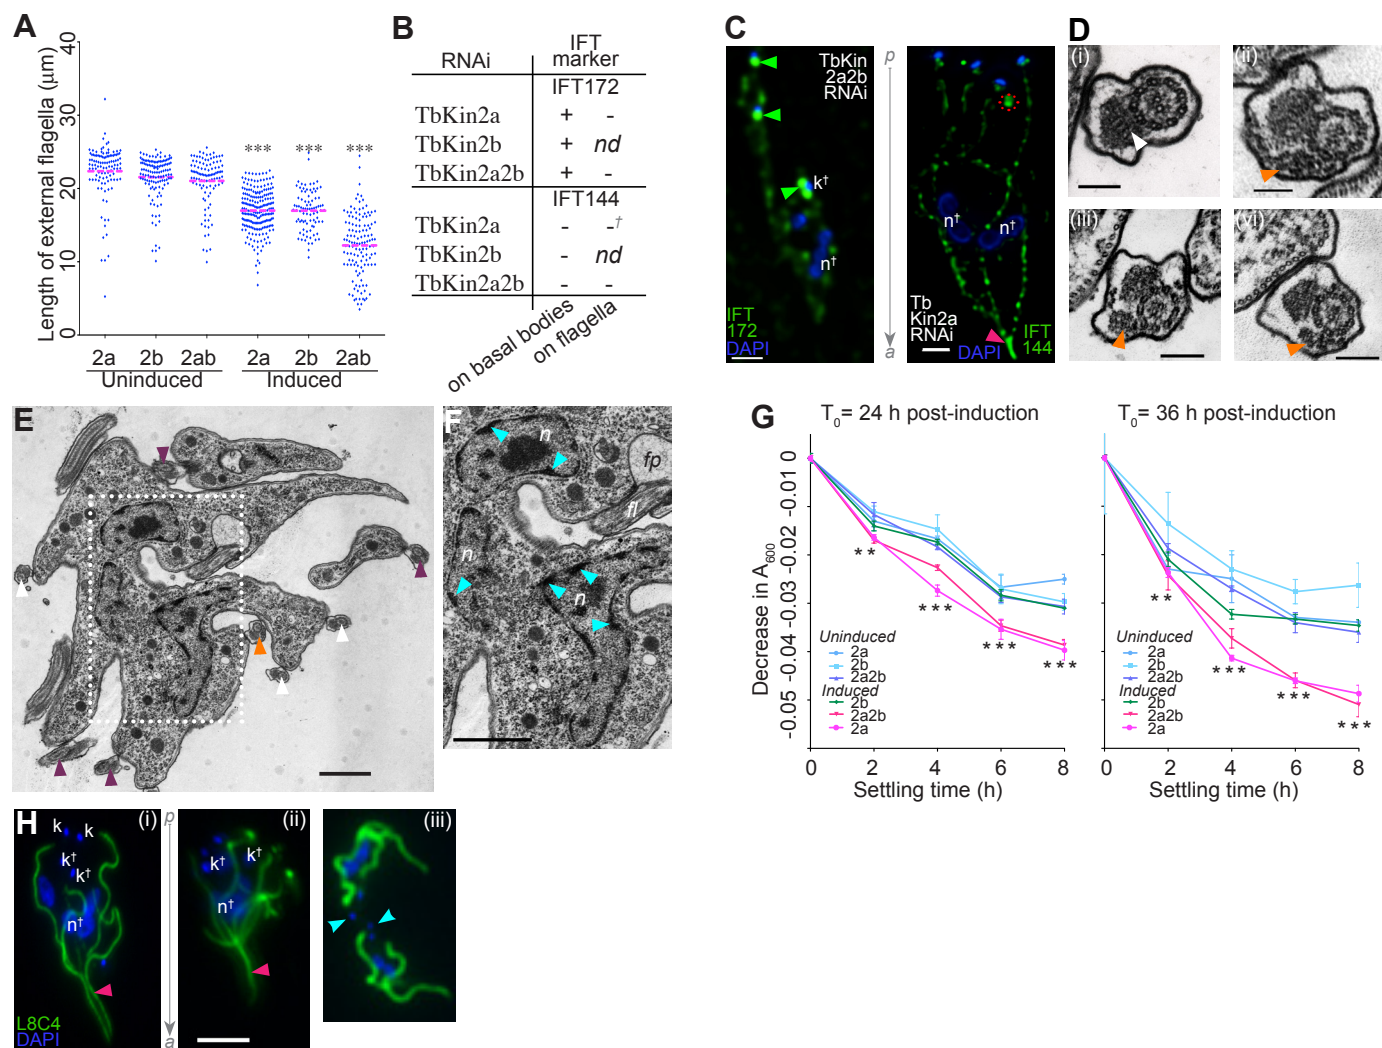



## Figure S1, Douglas *et al.*

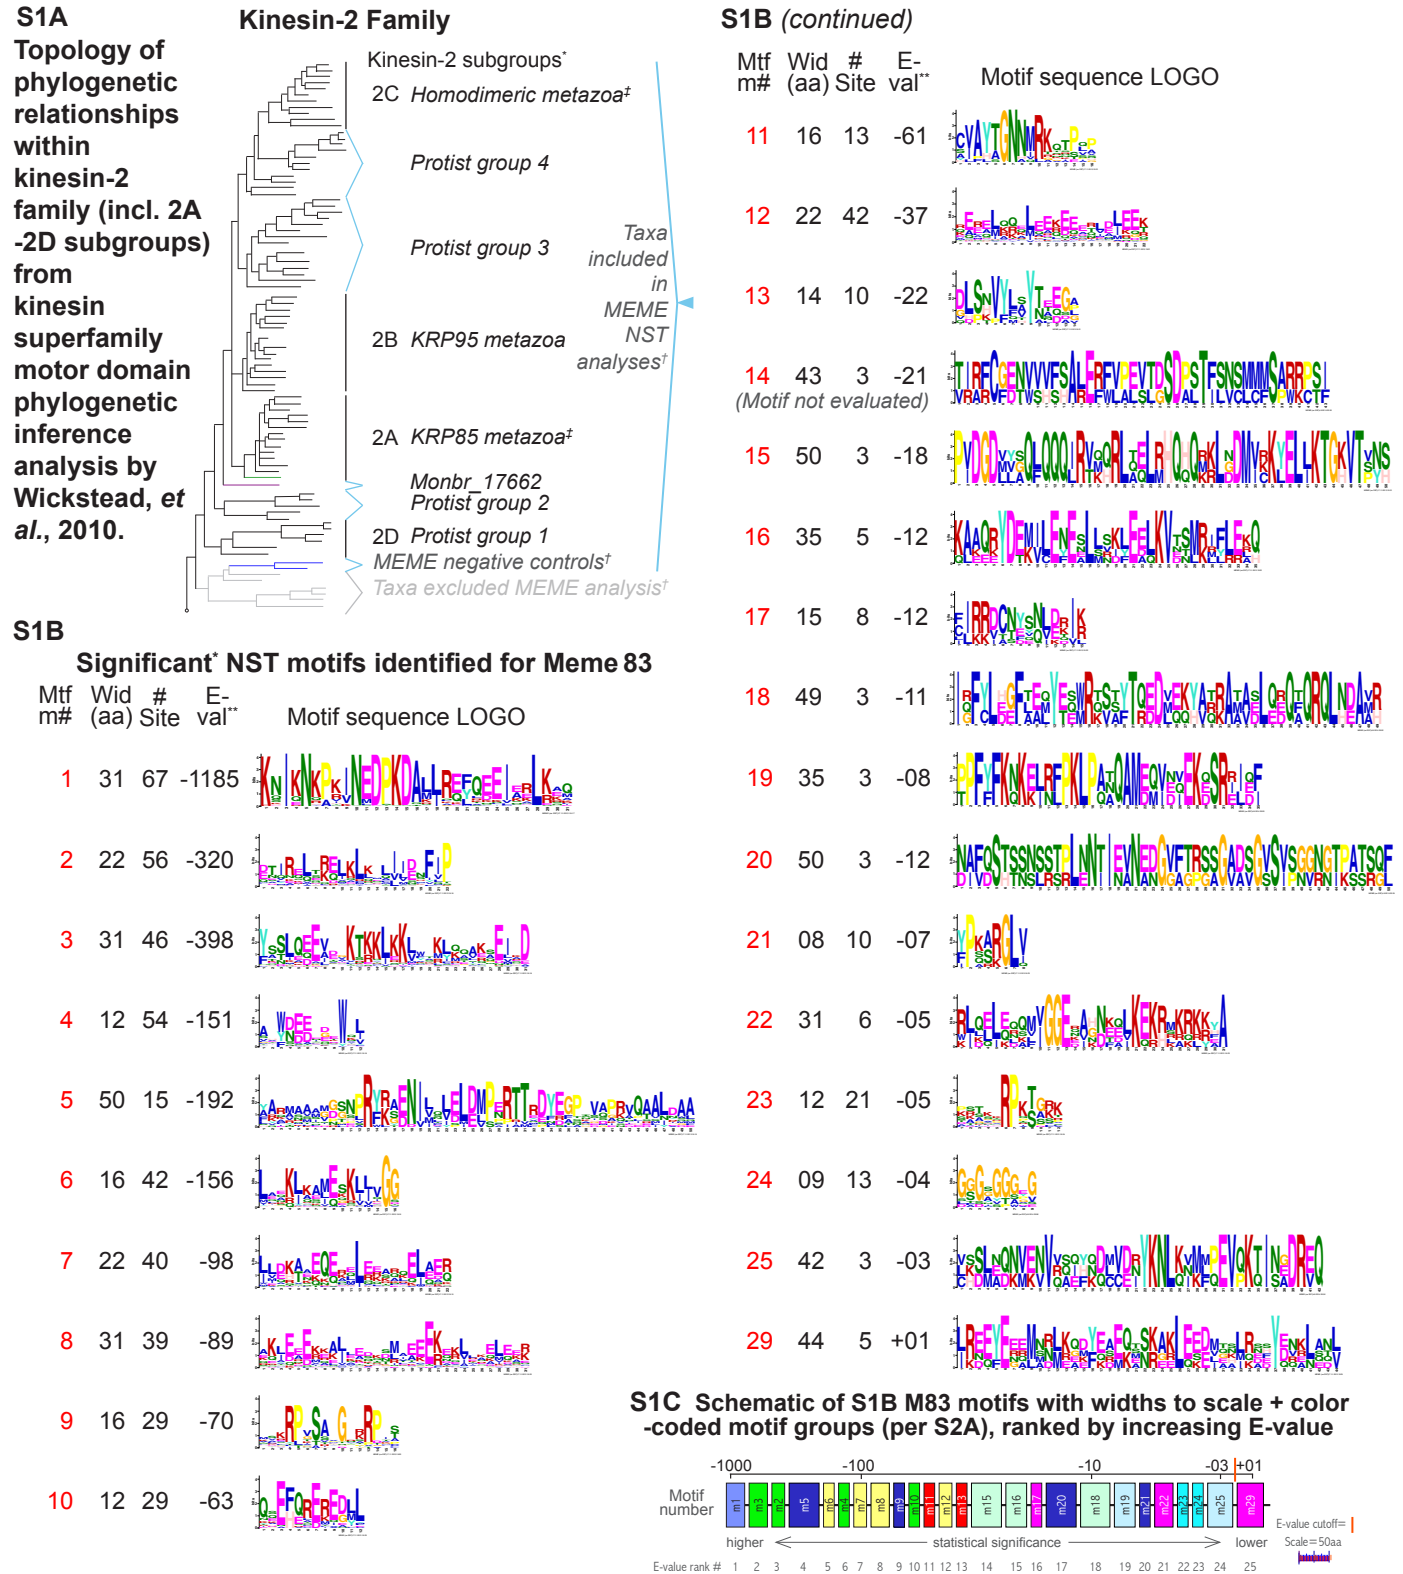

**Fig. S1. Kinesin-2 family phylogeny and NST motifs.** (A) Kinesin-2 family phylogentic tree topology adapted from the previous analysis by using motor domain sequences; branch lengths shown do not indicate evolutionary distances. Symbols: †Our early MEME analyses showed these NST sequences to be distinct from remaining kinesin-2 taxa; for additional information see Table S3A. ‡Monbr\_16629 and Monbr\_23354 of the holozoan *M. brevicolis* were respectively assigned to subgroups 2A and 2C by . Monbr\_23354 had a putative NST domain too short for MEME analysis. (B) Kinesin-2 motor domain sequences are more highly conserved than kinesin-2 NST sequences (see Tables S1 for motor domain sequence comparisons, and Tables S2 for NST sequence comparisons). The NST analyses relied primarily upon the MEME tool suite, which can identify conserved motifs independently of sequence alignment or motif order. We carried out over 80 MEME runs because of variation between runs due to differences in run parameters and taxa used as described in Materials and Methods. Shown in the figure are the 25 statistically significant NST motifs (based on MEME-determined individual motif overall E-values) plus one additional motif identified in a single representative run (MEME 83). Shown are: motif number (Mft m#); optimal width (amino acids or aa); the total number of significant, non-overlapping, independent motifs identified in the data set (# sites); the E-value overall statistical significance measure for each motif as defined in (expressed as integer (e.g. -10), equivalent to  $1 \times 10^{E\text{-value}}$  with lower E-values being more statistically significant), with a motif overall E-value significance cutoff of -02 as recommended in MEME, with the exception of motif 29 which had an E-value = 1; and each motif's MEME-identified amino acid consensus sequence (LOGO) as determined (within MEME) using the sequence display program LOGO. Motif E-values are calculated in MEME based on combined motif p-values on individual taxa, with only significant motif p-values ( $\leq 1 \times 10^{-10}$ ) on individual taxa used to calculate E-values. (C) Schematic of individual motifs from S1B arranged from left to right in order of increasing E-values (from most to least significant). Widths of individual motifs are displayed to scale for motifs having 16 aa or greater; motif widths of 8 - 15 aa are displayed as equal to 16 aa for visibility. Each motif is color-coded according to the motif group to which it is assigned. Orange bar indicates E-value = -02 statistical significance cutoff. Scale bar = 50 aa (with the exceptions stated above).

**Bailey, T. L. and Gribskov, M.** (1998). Methods and statistics for combining motif match scores. *J. Comput. Biol.* **5**, 211–221.

**Bailey, T. L., Boden, M., Buske, F. A., Frith, M., Grant, C. E., Clementi, L., Ren, J., Li, W. W. and Noble, W. S.** (2009). MEME SUITE: tools for motif discovery and searching. *Nucleic Acids Res.* **37**, W202–8.

**Bailey, T. L., Williams, N., Misleh, C. and Li, W. W.** (2006). MEME: discovering and analyzing DNA and protein sequence motifs. *Nucleic Acids Res.* **34**, W369–73.

**Crooks, G. E., Hon, G., Chandonia, J.-M. and Brenner, S. E.** (2004). WebLogo: a sequence logo generator. *Genome Res.* **14**, 1188–1190.

**De Marco, V., Burkhard, P., Le Bot, N., Vernos, I. and Hoenger, A.** (2001). Analysis of heterodimer formation by Xklp3A/B, a newly cloned kinesin-II from *Xenopus laevis*. *EMBO J* **20**, 3370–3379.

**Schneider, T. D. and Stephens, R. M.** (1990). Sequence logos: a new way to display consensus sequences. *Nucleic Acids Res.* **18**, 6097–6100.

**Wickstead, B., Gull, K. and Richards, T. A.** (2010). Patterns of kinesin evolution reveal a complex ancestral eukaryote with a multifunctional cytoskeleton. *BMC Evol. Biol.* **10**, 110.

## Figure S2, Douglas *et al.*

### S2A

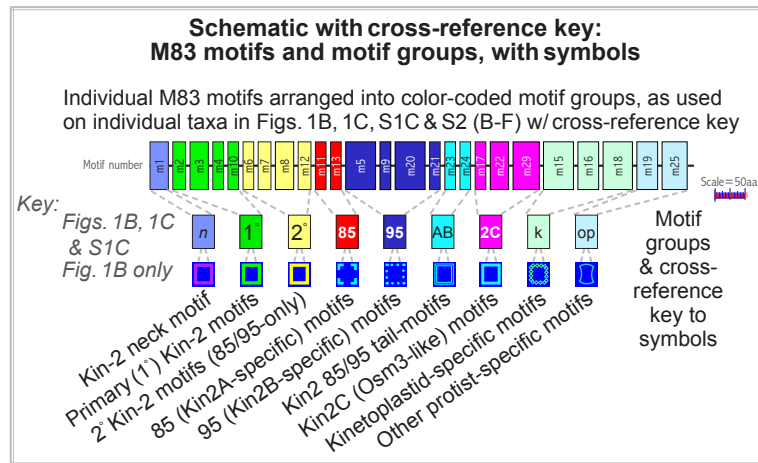

### S2B Taxon motifs key w/ motif heights indicating p-value ranges

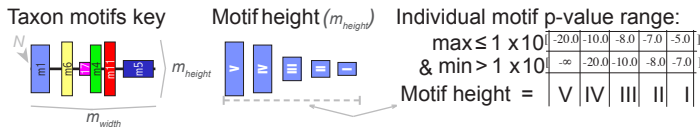

### S2C Both motifs and motif groups relative order broadly conserved

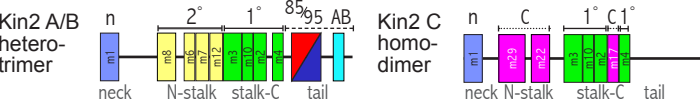

### S2E TbKin2a and select kinetoplastid homologs

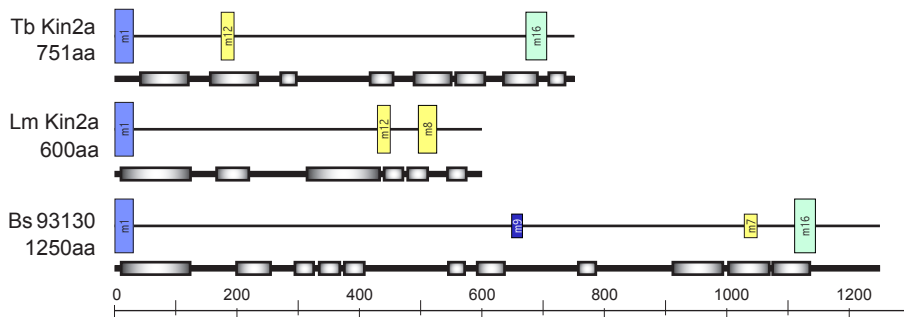

### S2F Shared 2C motif on TbKin2b, kinetoplastid homologs & metazoan 2C taxa

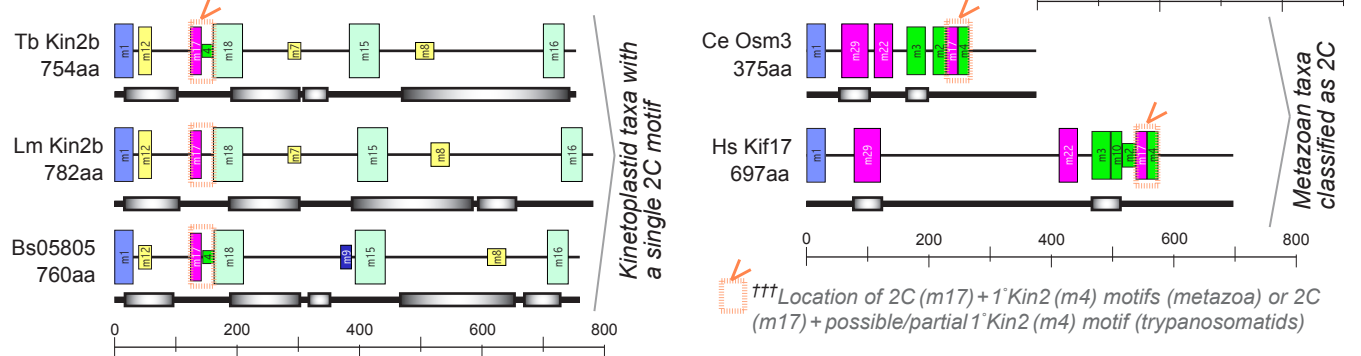

### S2D

**Selected taxa with conserved 1° Kin2 & 2° Kin2 + (85 / 95 motifs)†**

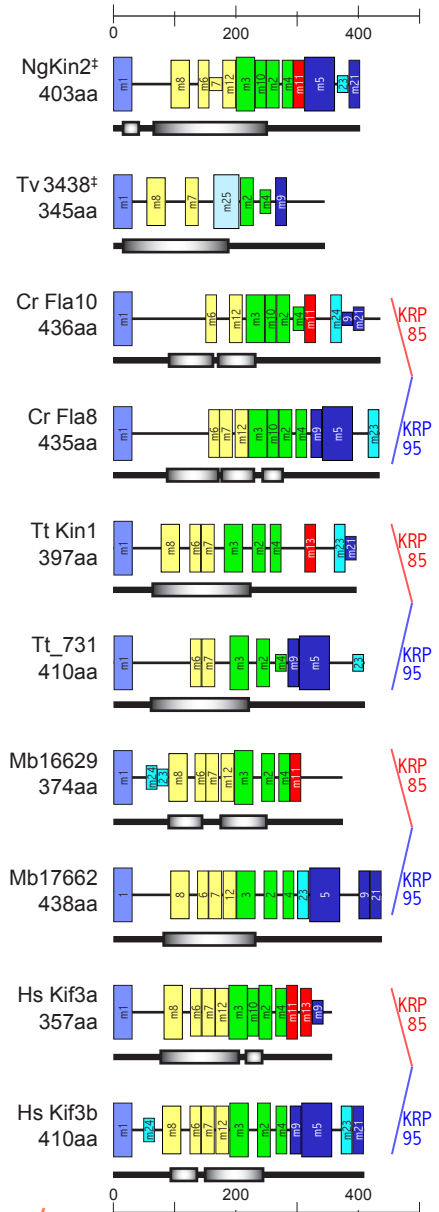

**Fig. S2. Kinesin-2 NST motifs and motif groups in individual taxa.** (A) Schematic of individual motifs arranged into motif groups. Motif groups are cross-referenced to motif group symbols that are used in Fig. 1 (B-D). In Fig. 1 and Fig. S2, references to motif group 2A/ KRP85/ 85 are equivalent, as are references to motif group 2B/ KRP95/ 95, and motif group 2C/ OSM3. See Fig. S1C legend for motif scaling information. (B) Key showing how the height of motif boxes on individual taxa scales with motif p-value ranges. Roman numerals from V to I show taxon-specific individual motif p-value ranges as follows: V = p-value  $\leq 1 \times 10^{-20}$ , IV = p-value  $>1 \times 10^{-20}$  and  $\leq 1 \times 10^{-10}$ , III = p-value  $>1 \times 10^{-10}$  and  $\leq 1 \times 10^{-08}$ , II = p-value  $>1 \times 10^{-08}$  and  $\leq 1 \times 10^{-07}$ , I = p-value  $>1 \times 10^{-07}$  and  $\leq 1 \times 10^{-05}$ . (C) Schematic showing that motif order is generally conserved among kinesin-2 proteins as depicted. (D) NST motifs for a selected group of heterotrimeric kinesin-2A and -2B proteins across a broad evolutionary backdrop illustrate sequence motif conservation noted in (C). In particular, we observed a high frequency of 1° motifs 2, 3, 4 on taxa, especially signature residues [F - I - P] that terminate 1° motif 2, and [W/Y - 6X (with 1-3 E/D) - W] in 1° motif 4, which were observed previously. (E) NST motifs for TbKin2a and homologs LmKin2a and Bs93130. One common kinesin-2 motif (2° motif 12) had a significant p-value on 2 of 3 taxa. (F) NST motifs for TbKin2b, the related LmKin2b and Bs05805, as well as the kinesin-2C proteins CeOSM3 and HsKif17. Note that 2C motif 17 is followed directly by 1° motif 4 for both metazoan taxa, 1° motif 4 for *T. brucei* and *B. saltans* taxa and a possible (low p-value) amino acid signature for *L. major* (not shown). TbKin2b and kinetoplastid homologs also have a predicted 2° motif 12, here located consistently just after neck domain of the 3 kinetoplastid proteins.

## Supplemental Figure S3, Douglas *et al.*

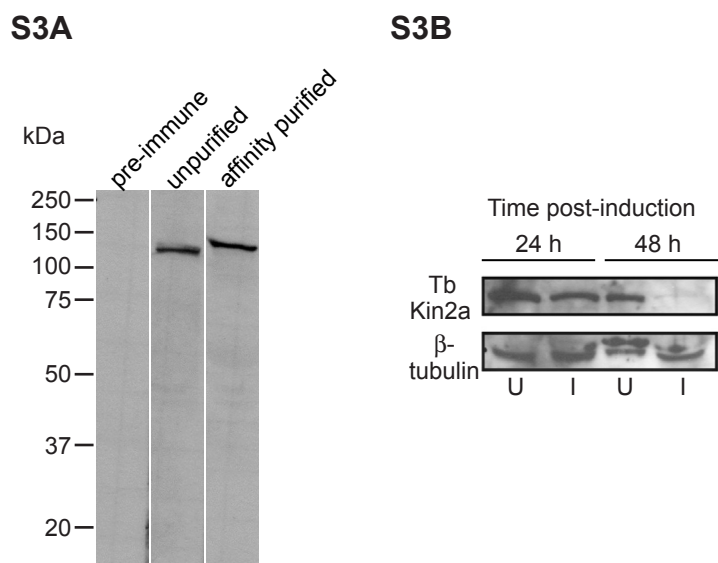

**Fig. S3.** (A) Immunoblots of whole-cell extracts from *T. brucei* probed with preimmune serum (left), unpurified post-immune serum (center), and affinity-purified polyclonal antibody (right). (B) Immunoblots of whole-cell extracts probed with anti-TbKin2a antibody (top) and anti- $\beta$ -tubulin antibody KMX (bottom), from uninduced cells (U), or TbKin2a RNAi induced cells (I) at 24 and 48 h post induction.
